1 **Title: Alternative splicing and translation play important roles in parallel with**  
2 **transcriptional regulation during rice hypoxic germination**

3 Running title: Proteogenomic analysis of rice hypoxic germination

4

5 Mo-Xian Chen<sup>a,b,1</sup>, Fu-Yuan Zhu<sup>b,c,1</sup>, Feng-Zhu Wang<sup>d,1</sup>, Neng-Hui Ye<sup>e</sup>, Bei Gao<sup>f</sup>, Xi  
6 Chen<sup>g</sup>, Shan-Shan Zhao<sup>d</sup>, Tao Fan<sup>a</sup>, Yun-Ying Cao<sup>f, i</sup>, Tie-Yuan Liu<sup>f</sup>, Ze-Zhuo Su<sup>d</sup>,  
7 Li-Juan Xie<sup>d</sup>, Qi-Juan Hu<sup>c</sup>, Hui-Jie Wu<sup>i</sup>, Shi Xiao<sup>d</sup>, Jianhua Zhang<sup>b,j,2</sup> and Ying-Gao  
8 Liu<sup>a,2</sup>

9

10 <sup>a</sup> State Key Laboratory of Crop Biology, College of Life Science, Shandong  
11 Agricultural University, Taian, Shandong, China.

12 <sup>b</sup> Shenzhen Research Institute, The Chinese University of Hong Kong, Shenzhen,  
13 China.

14 <sup>c</sup> College of Biology and the Environment, Nanjing Forestry University, Nanjing,  
15 Jiangsu Province, 210037, China.

16 <sup>d</sup> State Key Laboratory of Biocontrol and Guangdong Provincial Key Laboratory of  
17 Plant Resources, School of Life Sciences, Sun Yat-sen University, Guangzhou, China.

18 <sup>e</sup> Southern Regional Collaborative Innovation Center for Grain and Oil Crops in China,  
19 Hunan Agricultural University, Changsha, 410128, China.

20 <sup>f</sup> School of Life Sciences, The Chinese University of Hong Kong, Shatin, Hong Kong.

21 <sup>g</sup> Wuhan Institute of Biotechnology, Wuhan, China.

22 <sup>h</sup> China National GeneBank, BGI-Shenzhen, Shenzhen 518120, China.

23 <sup>i</sup> College of Life Sciences, Nantong University, Nantong, Jiangsu, China.

24 <sup>j</sup> Department of Biology, Hong Kong Baptist University, and State Key Laboratory of  
25 Agrobiotechnology, The Chinese University of Hong Kong, Shatin, Hong Kong.

26 <sup>1</sup>These authors contributed equally to this work.

27 <sup>2</sup>To whom correspondence should be addressed. Email: [liuyg@sdau.edu.cn](mailto:liuyg@sdau.edu.cn) and  
28 [jzhang@hkbu.edu.hk](mailto:jzhang@hkbu.edu.hk)

29

30 Corresponding authors

31 Liu Ying-Gao

32 State Key Laboratory of Crop Biology, College of Life Science, Shandong  
33 Agricultural University, Taian, Shandong, China

34 [liuyg@sdau.edu.cn](mailto:liuyg@sdau.edu.cn) Tel.: (86) 538 8249767

35 Zhang Jianhua

36 Department of Biology, Hong Kong Baptist University, and State Key Laboratory of  
37 Agrobiotechnology, The Chinese University of Hong Kong, Shatin, Hong Kong.

38 [jzhang@hkbu.edu.hk](mailto:jzhang@hkbu.edu.hk) Tel.: (852) 3411 7011

39 **Abstract**

40 Post-transcriptional mechanisms, including alternative splicing (AS) and alternative  
41 translation initiation (ATI), have been used to explain the protein diversity involved in  
42 plant developmental processes and stress responses. Rice germination under hypoxia  
43 conditions is a classical model system for the study of low oxygen stress. It is known  
44 that there is transcriptional regulation during rice hypoxic germination, but the  
45 potential roles of AS and ATI in this process are not well understood. In this study, a  
46 proteogenomic approach was used to integrate the data from RNA sequencing,  
47 qualitative and quantitative proteomics to discover new players or pathways in the  
48 response to hypoxia stress. The improved analytical pipeline of proteogenomics led to  
49 the identification of 10,253 intron-containing genes, 1,729 of which were not present  
50 in the current annotation. Approximately 1,741 differentially expressed AS (DAS)  
51 events from 811 genes were identified in hypoxia-treated seeds in comparison to  
52 controls. Over 95% of these were not present in the list of differentially expressed  
53 genes (DEG). In particular, regulatory pathways such as spliceosome, ribosome, ER  
54 protein processing and export, proteasome, phagosome, oxidative phosphorylation  
55 and mRNA surveillance showed substantial AS changes under hypoxia, suggesting  
56 that AS responses are largely independent of traditional transcriptional regulation.  
57 Massive AS changes were identified, including the preference usage of certain  
58 non-conventional splice sites and enrichment of splicing factors in the DAS datasets.  
59 In addition, using self-constructed protein libraries by 6-frame translation, thousands  
60 of novel proteins/peptides contributed by ATI were identified. In summary, these  
61 results provide deeper insights towards understanding the underlying mechanisms of  
62 AS and ATI during rice hypoxic germination.

63 **Keywords:** alternative splicing, hypoxia, *Oryza sativa*, proteogenomics, seed  
64 germination, splicing factor, translation initiation.

65

## 66 **INTRODUCTION**

67 Rice is a staple food that provides dietary nutrition for more than two billion people  
68 around the world (Yang and Zhang, 2006). In addition, rice is a model monocot plant  
69 used in modern research. Rice has been reported to have the ability to survive periods  
70 of submergence from seed germination to adult plants (Atwell et al., 2015). In  
71 particular, it has been documented as one of the few species that can germinate under  
72 anoxia by elongating its coleoptile to reach the water surface (Berta and Ismail, 2013).  
73 This adaptation to oxygen deprivation caused by flooding can be used as a model to  
74 study molecular mechanisms in response to hypoxic or anoxic conditions. Flooding is  
75 becoming one of the most severe abiotic stresses worldwide (Sasidharan et al., 2017).  
76 As the primary stresses due to flooding, hypoxia and anoxia have drawn much  
77 attention in the past decade. Under normal oxygen concentrations, oxygen gradients  
78 have been reported in dense plant organs, including seeds, fruits and tubers  
79 (Sasidharan et al., 2017). Thus, studying the molecular mechanisms during hypoxic or  
80 anoxic conditions may facilitate an understanding of the function of O<sub>2</sub> molecules in  
81 both stress response and plant development. In recent years, a N-end rule protein  
82 degradation pathway has been proposed to be an important oxygen sensing  
83 mechanism in Arabidopsis (Gibbs et al., 2011; Licausi et al., 2011). Its downstream  
84 components, plant ethylene-responsive transcription factors, are affected by this  
85 pathway to activate or deactivate their target genes in response to hypoxia (Weits et al.,  
86 2014; Giuntoli et al., 2017). Increasing numbers of loci involved in flooding responses  
87 have been characterized, including those in lipid signalling (Xie et al., 2015),  
88 jasmonic acid and antioxidant pathways (Yuan et al., 2017), protein kinase (Chang et  
89 al., 2012) and transcription factor (Giuntoli et al., 2017). However, few studies are  
90 related to functional characterization of rice genes during flooding germination. In

91 addition to the classical CIPK15-SnRK1A-MYBS1- mediated sugar-sensing pathway  
92 (Lu et al., 2007; Lee et al., 2009), a mitochondrion-localized protein (OsB12D1) has  
93 been reported to enhance flooding tolerance in rice germination and subsequent  
94 seedling growth (He et al., 2014). In addition, a rice trehalose-6-phosphate (T6P)  
95 phosphatase (OsTPP7) gene has been proposed to increase sink strength in response  
96 to flooding germination (Kretzschmar et al., 2015).

97       With the development of large profiling techniques, considerable efforts have  
98 been made to study the global transcripts changes, protein abundance and metabolic  
99 variation during rice hypoxic germination (Lasanthi-Kudahettige et al., 2007; Narsai  
100 et al., 2009; Narsai et al., 2011; Sadiq et al., 2011; Narsai et al., 2015; Hsu and Tung,  
101 2017). Although comparative analysis indicates that part of the hypoxic responsive  
102 pathways are conserved among several species (Narsai et al., 2011), the mechanism of  
103 adult flooding tolerance may be largely different from that of seed flooding tolerance  
104 (Lu et al., 2007; Lee et al., 2009). Furthermore, recent RNA seq analysis using eight  
105 Arabidopsis ecotypes suggests that alternative splicing could be another pivotal factor  
106 involved in hypoxic responses (Van et al., 2016). Alternative splicing results from  
107 post-transcriptional control of eukaryotic intron-containing genes. Recent  
108 advancement reveals that more than 95% of genes have splicing isoforms in mammals  
109 (Eckardt, 2013). Two major types of splicing complex have been documented that can  
110 determine the splicing site sequences. One is the U2 complex, which can splice at a  
111 5'-GT-AG-3' exon-intron junction. The other is called the U12 complex and is able to  
112 utilize 5'-AT-AC-3' as a splicing junction (Zdraviko J et al., 2005; Will and Luhrmann,  
113 2011). Alternative splicing from multiexonic genes has been regarded as a potential  
114 way to increase plant genome coding ability (James et al., 2012; Ruhl et al., 2012;  
115 Chang et al., 2014; Feng et al., 2015). In addition to alternative splicing, another type  
116 of post-transcriptional regulation defined as alternative translation initiation (ATI) is

117 involved in contributing to protein diversity (Sonenberg and Hinnebusch, 2009).  
118 Recent identification of translation initiation sites using advanced technology such as  
119 ribosome sequencing and MS-based proteomics reveals that a large number of these  
120 sites are not conventional AUG sequences (Sonenberg and Hinnebusch, 2009; Ingolia  
121 et al., 2011; Lee et al., 2012). In comparison to AS regulation (James et al., 2012;  
122 Ruhl et al., 2012; Chang et al., 2014; Feng et al., 2015; Wang et al., 2015; Zhan et al.,  
123 2015; Thatcher et al., 2016), the function of ATI has been seldom reported in plants  
124 (de Klerk and t Hoen, 2015). The above techniques have demonstrated that the  
125 eukaryotic genome has the ability to encode short peptides, including upstream open  
126 reading frames (uORFs) and other small ORFs, that are located in previously marked  
127 non-coding regions of the genome (Tavormina et al., 2015). Several peptides have  
128 been characterized to show crucial roles in regulating plant development and stress  
129 responses (Simon and Dresselhaus, 2015; Tameshige et al., 2016).

130 In summary, although stress-induced genome-wide AS changes have been  
131 extensively documented in various plant species (Yang et al., 2015; Thatcher et al.,  
132 2016; Van et al., 2016; Fesenko et al., 2017), the quantification of corresponding AS  
133 isoforms at the protein level have seldom been reported. In this study, a parallel RNA  
134 seq and proteomic approach defined as proteogenomic has been applied to achieve  
135 integrative analysis using both transcriptome and proteome data. Given our previous  
136 experience in ABA-regulated AS analysis (Zhu et al., 2017), we further improved our  
137 analytical pipeline for the determination of AS- and ATI-induced genome coding  
138 ability. The results from this study further expand our understanding of genome  
139 coding ability in rice seeds, suggesting an underlying regulatory network resulting  
140 from AS and ATI during rice hypoxic germination. Understanding this hidden network  
141 may facilitate the agricultural production of rice that is suitable for direct seeding  
142 systems and provide guidelines for improving hypoxic tolerance in other crop species.

143 **Materials and methods**

144 **Plant material, growth conditions and hypoxic treatment**

145 Seeds of *Oryza sativa* (Nipponbare) were surface-sterilized with 20% bleach and  
146 0.05% Tween-20 before treatments. Seeds (~30-50 individuals) were placed on petri  
147 dishes with wet filter paper and then were transferred to air control or hypoxia  
148 conditions under complete darkness. The hypoxia treatment was carried out using the  
149 Whitley H35 Hypoxystation (Don Whitley Scientific Limited, UK) with 3% O<sub>2</sub> level  
150 at 28°C. Seed samples were harvested at 6 h after treatments and used for further  
151 transcriptomic and proteomic analysis.

152

153 **Rice seed RNA extraction and RNA sequencing**

154 Rice seed total RNA were ground in liquid nitrogen and extracted using a Plant  
155 RNeasy Mini Kit (Qiagen, Germany) according to the manufacturer's instructions.  
156 RNA-sequencing (RNA-seq) experiments were conducted as previously described  
157 with minor modifications (Zhu et al., 2017). The resulting cDNA library constructed  
158 from rice seed RNA samples (Air\_6 h and Hypoxia\_6 h) were used for paired end (2 x  
159 125 bp) sequencing on an Illumina HiSeq 4000 platform by Annoroad Gene  
160 Technology Co. Ltd. (Beijing, China). Three replicates for each sample were trimmed  
161 to obtain clean reads for subsequent analysis (Supplemental Table 1).

162

163 **Analysis of RNA sequencing and proteomic data**

164 The rice (Nipponbare) reference genome annotation file (*Oryza\_sativa*.IRGSP-1.0.32)  
165 was downloaded from the Ensembl website (<http://www.ensembl.org/index.html>).  
166 Clean reads mapping and subsequent bioinformatic analysis was as described  
167 previously (Zhu et al., 2017). The analytical pipeline is summarized in Supplemental  
168 Fig. 1. As mentioned previously (Zhu et al., 2017), significant changes of

169 differentially expressed genes (DEG) (Supplemental Table 2) and differentially  
170 expressed alternative splicing events (DAS) (Supplemental Table 3) were determined  
171 as  $\text{Log}_2\text{FC} > 2$  and  $q$ -value (false discovery rate,  $\text{FDR} < 5\%$ ). Identification and  
172 quantification of AS events were conducted by using the software ASprofile  
173 (<http://ccb.jhu.edu/software/ASprofile>) (Florea et al., 2013). Splicing junctions  
174 reported in this study was generated by default settings of TopHat v2.1 aligner. The  
175 AS events with no expression values were filtered out before subsequent analysis  
176 (Zhu et al., 2017). Gene ontology analysis (GO, <http://geneontology.org/>) and Kyoto  
177 encyclopedia of genes and genomes (KEGG, <http://www.kegg.jp/>) enrichment  
178 classification were carried out using both DEG and DAS datasets. Heatmaps were  
179 generated using the BAR HeatMapperPlus tool  
180 ([http://bar.utoronto.ca/ntools/cgi-bin/ntools\\_heatmapper\\_plus.cgi](http://bar.utoronto.ca/ntools/cgi-bin/ntools_heatmapper_plus.cgi)). The splicing sites  
181 conservation analysis was performed using WebLogo v3  
182 (<http://weblogo.threepiusone.com/>) (Crooks et al., 2004).

183

#### 184 **Total protein extraction, digestion and qualitative identification**

185 Total protein of rice seeds was extracted and digested as described previously (Chen  
186 et al., 2014) with minor modifications. In general, approximately 5 g of rice seed  
187 tissues of each sample were ground in liquid nitrogen for subsequent proteomic  
188 analysis. The precipitated protein pellets were digested by trypsin and desalted using a  
189 Sep-Pak C<sub>18</sub> column (Waters). The resulting peptides were then separated and  
190 characterized in a TripleTOF 5600<sup>+</sup> (AB SCIEX) splitless Ultra 1D Plus (Eksigent)  
191 system (Andrews et al., 2011).

192

#### 193 **Peptide dimethyl labelling and quantitative proteomics**

194 The quantitative proteomics was conducted as described previously with minor

195 modifications (Zhou et al., 2015). Digested peptides were dissolved with 0.1 M  
196 sodium acetate (pH $\approx$ 6, best below 6) (*i.e.*, 500  $\mu$ g peptides per 0.25 mL sodium  
197 acetate). Either 4% formaldehyde or formaldehyde-d2 (40  $\mu$ L per 500  $\mu$ g peptides)  
198 were added and mixed. Then, 40  $\mu$ L / 500  $\mu$ g peptides of 0.6 M NaBH<sub>3</sub>(CN) were  
199 added. The solution mixture was shaken for 0.5 h. Furthermore, 160  $\mu$ L / 500  $\mu$ g  
200 peptides of 1% NH<sub>4</sub>OH, was added and mixed for 5 min. Then, 5% formic acid (160  
201  $\mu$ L per 500  $\mu$ g peptides) was added and mixed. The solution was placed in 4°C for at  
202 least 1 h. The light and heavy dimethyl labelling peptides were combined in a 1:1  
203 ratio and desalted using a Sep-Pak C<sub>18</sub> column (Waters).  
204 Mixed peptides were subsequently fractionated by using a C<sub>18</sub>-ST column (2.0 mm  $\times$   
205 150 mm, 5  $\mu$ m particle size) (TechMate) on the Agilent 1260 system (Agilent  
206 Technologies). An elution gradient of 60 min was used for peptide separation with 20  
207 mM ammonium formate in H<sub>2</sub>O (adjusted to pH 10 by 25% NH<sub>3</sub>.H<sub>2</sub>O) as solvent A  
208 and 20 mM ammonium formate in 80% ACN (adjust pH to 10 by 25% NH<sub>3</sub>.H<sub>2</sub>O) as  
209 solvent B. The gradient elution profile was composed of 5%-25% B for 20 min,  
210 25-45% B for 15 min, 45-90% B for 1 min, then maintained at 90% B for 4 min,  
211 followed by 10-95% A for 1 min, and ending with 95% A for 14 min. The flow rate  
212 was 0.2 mL/min. UV absorbance was monitored at 216 nm. A total of 60 0.2 mL  
213 fractions were collected, then concatenated and mixed to obtain 20 fractions.  
214 Fractions were dried *via* speed-vacuum and desalted by the StageTip C<sub>18</sub> method.  
215 RPLC-ESI-MS/MS was used to detect the sample. LC-MS/MS detection was carried  
216 out on a hybrid quadrupole-TOF LC/MS/MS mass spectrometer (TripleTOF 5600<sup>+</sup>,  
217 AB Sciex) equipped with a nanospray source. Peptides were first loaded onto a C<sub>18</sub>  
218 trap column (5  $\mu$ m, 5  $\times$  0.3 mm, Agilent Technologies) and then eluted into a C<sub>18</sub>  
219 analytical column (75  $\mu$ m  $\times$  150 mm, 3  $\mu$ m particle size, 100 Å pore size, Eksigent).  
220 Mobile phase A (3% DMSO, 97% H<sub>2</sub>O, 0.1% formic acid) and mobile phase B (3%



221 DMSO, 97% ACN, 0.1% formic acid) were used to establish a 100 min gradient,  
222 which consisted of 0 min of 5% B, 65 min of 5-23% B, 20 min of 23-52% B, 1 min of  
223 52–80% B, and the gradient was maintained in 80% B for 4 min, followed by 0.1 min  
224 of 80–85% B, and a final step in 5% B for 10 min. A constant flow rate was set at 300  
225 nL/min. MS scans were conducted from 350 to 1500 amu, with a 250 ms time span.  
226 For MS/MS analysis, each scan cycle consisted of one full-scan mass spectrum (with  
227 m/z ranging from 350 to 1500 and charge states from 2 to 5) followed by 40 MS/MS  
228 events. The threshold count was set to 120 to activate MS/MS accumulation, and  
229 former target ion exclusion was set for 18 s.

230

### 231 **Library construction and mass spectrometry database searching**

232 An AS junction library (576,570 entries) was constructed as described previously  
233 (Sheynkman et al., 2013; Castellana et al., 2014; Walley and Briggs, 2015) with minor  
234 modifications. In brief, six-frame translations, including 3 frames on the forward  
235 strand and 3 frames on the reverse complement strand, were used construct the AS  
236 junction library. Additionally, a frame library was constructed using all transcripts  
237 annotated in the reference annotation file by 6 frames. The redundant sequences were  
238 then removed from translated sequences at the first step. Peptide sequences longer  
239 than 6 amino acids were attached to the UniProt rice japonica database for subsequent  
240 database search. Raw spectrum data generated from both qualitative and quantitative  
241 proteomics were searched with the ProteinPilot software (v5.0, AB SCIEX) using  
242 preset parameters. All data were filtered at 1% FDR with at least 1 peptide at 95%  
243 confidence level calculated automatically by the ProteinPilot software (Zhu et al.,  
244 2017). For quantitative proteomics, data were searched against UniProt and  
245 self-constructed databases using the following parameters: sample type, dimethyl (0,  
246 +4) quantitation; cys alkylation, iodoacetamide, digestion, trypsin. The search effort

247 was set to rapid ID. For DEP analysis, proteins with a fold change of >1.2 or <0.8 (*P*  
248 value <0.05) are considered as DEP in this study.

249

### 250 **Quantitative real-time PCR validation of AS transcripts**

251 Total RNA (~5 µg) was reverse-transcribed into cDNA by using the Superscript  
252 First-Strand Synthesis System (Invitrogen, USA) following the manufacturer's  
253 instructions. Quantitative real-time PCR (qRT-PCR) was conducted as described  
254 previously (Zhu et al., 2013). Resulting products of qRT-PCR were subjected to DNA  
255 sequence analysis. Isoform-specific primers used for AS isoforms identification are  
256 listed in Supplemental Table 5.

257

### 258 **Data submission.**

259 The rice transcriptome data have been uploaded to Sequence Read Archive  
260 (<https://www.ncbi.nlm.nih.gov/sra>) under Bioproject PRJNA451248. The raw data of  
261 qualitative and quantitative proteomics have been submitted to the PRIDE  
262 PRoteomics IDentifications (PRIDE) database with accession number PXDxxxxxx  
263 and PXDxxx, respectively.

264

## 265 **Results**

### 266 **Improvement of analytical pipeline and experimental conditions**

267 The analytical pipeline used in this study is presented in Supplemental Fig. 1.  
268 Improvements have been made since the last bioinformatic flowchart (Zhu et al.,  
269 2017). The identification and quantification procedures of AS events were simplified  
270 for subsequent GO and KEGG analysis. In addition, refinement of redundancy and  
271 error check steps further improved the accuracy of identification. In this study, AS  
272 events such as AFE (alternative first exon) and ALE (alternative last exon) purely

273 caused by alternative transcription start and poly adenylation has been removed to  
274 further differentiate AS modification from other transcriptional or post-transcriptional  
275 mechanisms. To distinguish 5' donor sites and 3' acceptor sites, we further divided AE  
276 (alternative exon) events into AE5' and AE3' for further bioinformatic analysis.  
277 Furthermore, incorporation of quantitative proteomics yielded more information on  
278 steady protein levels in comparison to qualitative proteomic profiling, which can only  
279 identify the presence of translated peptides (Zhu et al., 2017). For testing samples, we  
280 chose dry seeds of japonica rice (Nipponbare) treated with hypoxia (3% O<sub>2</sub>) for 6 h in  
281 comparison to air controls under complete darkness. This treatment will help us to  
282 understand the short-term responses at both transcripts and protein levels during  
283 hypoxia when seeds start to germinate. Plenty of samples were harvested for the  
284 following three profiling experiments: short-read RNA sequencing (RNA seq),  
285 qualitative and quantitative proteomics. Prior to these experiments, we have compared  
286 49 up-regulated anaerobic marker genes highlighted in previous publications to our  
287 dataset (Lasanthi-Kudahettige et al., 2007; Narsai et al., 2009). Among 21 genes  
288 detected in this study, 19 of these genes showed consistency on their differential  
289 regulation, but at a lower magnitude (Supplemental Fig. 2A). We used qRT-PCR to  
290 further validate those expressions. In total, 18 of 19 genes showed similar expression  
291 pattern as the result of our RNA seq data (Supplemental Fig. 2B), indicating the  
292 efficacy of hypoxic treatment using 3% O<sub>2</sub> in our system.

293

294 **Completely different set of genes undergo alternative splicing (AS) in response to**  
295 **hypoxia during rice seed germination**

296 Approximately 1.32 billion raw reads in total averaging 200 million reads per sample  
297 were obtained from RNA sequencing (Supplemental Table 1). Among these, 1.25  
298 billion clean reads were subjected to the mapping process. On average, approximately

299 95% were uniquely mapped to the genome and used for subsequent bioinformatic  
300 analysis (Supplemental Table 1). For AS identification, each sample identified over  
301 75,000 AS events. In total, 10,253/26,848 (38.2%) annotated intron-containing genes  
302 in rice seed were observed to exist as AS events in rice seeds. Approximately 6.4%  
303 (1,729/26,848) more intron-containing genes were observed in comparison to the  
304 original annotation file. Slightly differ from previous AS analysis in ABA-treated  
305 *Arabidopsis* seedlings (Zhu et al., 2017), alternative first exons (AFE), alternative last  
306 exons (ALE) and intron retention (IR) remained as the most abundant three AS events  
307 through all the samples (Fig. 1A). Among these three AS event types, AFE and ALE  
308 caused variable 5'- and 3'-untranslated ends, which may affect the efficiency of  
309 translation or stability of corresponding transcripts (Andreassi and Riccio, 2009;  
310 Sonmez et al., 2011; Jenal et al., 2012). For example, hidden small open reading  
311 frames (sORF) from the 5'-end of transcripts encoding short peptides have the ability  
312 to regulate translational efficiency of target transcripts (Laing et al., 2015), whereas  
313 polyadenylation at the 3'-end of transcripts is well known to affect the localization  
314 and stability of the transcripts (De et al., 2017). When the dataset of differentially  
315 expressed genes (DEG) (Supplemental Table 2) was compared to the dataset of  
316 differentially expressed AS genes (DAS) (Supplemental Table 3), over 95% were not  
317 the same (Fig. 1B). Only 23 genes were differentially regulated at both transcription  
318 and post-transcriptional levels (Fig. 1B). This suggests that alternative splicing may  
319 play an important and distinctive role during rice hypoxic germination. Subsequent  
320 gene ontology enrichment analysis also confirmed the result from the Venn diagram  
321 (Fig. 1B, Supplemental Fig. 3). In several cases, DEG and DAS genes did not coexist  
322 in the same secondary GO category (Supplemental Fig. 3). Fourteen isoforms of 7  
323 genes in the DAS dataset were assembled and validated by quantitative real-time PCR  
324 (qRT-PCR). In total, 6 of these genes were consistent to the data from RNA seq

325 analysis, suggesting the reliability of AS identification and quantification from the  
326 analytical pipeline (Supplemental Fig. 4). Except for categories related to linoleic acid  
327 metabolism, the majority of DEG and DAS genes were not enriched in the same  
328 KEGG category (Supplemental Fig. 3), suggesting that DAS category is a different  
329 group of genes in response to hypoxic germination. The majority of pathways  
330 enriched in DEG dataset were closely related to cellular metabolisms (*e.g.* pentose  
331 phosphate pathway, glycolysis/gluconeogenesis, fructose and mannose metabolism  
332 *etc.*) and cell growth (meiosis, DNA replication and cell cycle *etc.*). Whereas some  
333 regulatory pathways were specifically over-represented in DAS dataset, such as  
334 spliceosome, ribosome, ER protein processing, protein export, proteasome,  
335 phagosome, oxidative phosphorylation and mRNA surveillance pathway, implying  
336 that these pathways may play essential role in AS-mediated responses under rice  
337 hypoxic germination. Gene members in several pathways have been selected for  
338 RT-PCR and qRT-PCR validation (Fig. 1D and Fig. 2). Some splicing isoforms of  
339 corresponding gene showed differential expression under hypoxic treatment,  
340 indicating their potential role in response to rice hypoxic germination.

341

342 **Qualitative proteomic identification reveals that hypoxia-regulated AS events are**  
343 **more likely to be translated**

344 To further characterize the translational products of identified AS events, we carried  
345 out a qualitative proteomic profiling using tandem mass spectrometry (MS/MS) for  
346 both control and hypoxia-treated samples (Alfaro et al., 2014; Tavares et al., 2015;  
347 Zhu et al., 2017). Proteomic analysis this time generated 547,545 and 485,392  
348 high-quality spectra for control and hypoxia-treated samples, respectively.  
349 Approximately 5,549 and 5,385 proteins were identified using the UniProt database  
350 (Fig. 3A). Among these, 18.6% and 16.1% of identified proteins were uniquely

351 present in control or hypoxia-treated samples, respectively, serving as good candidates  
352 for further functional characterization. Subsequent AS junction library search  
353 identified 4,431 / 4,313 peptides from AS events (41,887) and 510 / 490 peptides from  
354 DAS events (1,742) for control / hypoxia-treated samples, respectively (Fig. 3A, B).  
355 Among these, approximately 70% of peptides were shared by both samples.  
356 Intriguingly, much fewer AFE events could be detected at peptide level in comparison  
357 to ALE events (Fig. 2B). Furthermore, 13.5% of the total AS events (5,652/41,887)  
358 were translated into peptides, suggesting that the majority of AS transcripts may be  
359 degraded by RNA surveillance mechanisms such as nonsense-mediated mRNA decay  
360 (NMD) (Nicholson et al., 2010; Drechsel et al., 2013). In contrast, an elevated  
361 percentage (38.3%) of DAS events could be translated into peptides in all AS types  
362 (Fig. 3B), indicating their potential role in response to hypoxic stress during rice  
363 germination. Similar observations have been reported in ABA-treated Arabidopsis  
364 seedlings, which indicates that thousands of AS proteins are translated under hypoxic  
365 conditions during rice germination, and most of these were not present in the DEG  
366 dataset analysed by a conventional RNA seq pipeline.

367 In addition, approximately 68.3% of AS events identified in this study were not  
368 annotated in the genome and thus were marked as new features for rice genome  
369 annotation (Fig. 3B). Additionally, 40.9% of the DAS peptides were not present in the  
370 current version of the annotation, which suggests the translation of new protein  
371 isoforms during rice germination in response to hypoxia. DAS peptides were  
372 subjected to KEGG enrichment analysis (Fig. 3C). For example, some KEGG terms  
373 including ribosome, proteasome and oxidative phosphorylation, were repeatedly  
374 enriched in both RNA seq and qualitative proteomic datasets, giving protein evidence  
375 of these splicing isoforms in response to hypoxia treatment.

376

377 **Quantitative proteomics indicates that the expression of protein and transcripts**  
378 **are correlated at the AS level**

379 To find relationship between the protein abundance and corresponding transcripts at  
380 the AS level, quantitative proteomics were conducted using the dimethyl labelling  
381 method. In total, 10,946 proteins were identified from this approach and 4566 of them  
382 were quantified (Supplemental Table 4). Among these, 278 differentially expressed  
383 proteins (DEP) and 29 differentially regulated AS peptides (DASP) were identified  
384 (Fig. 4A-B). Thirteen DASP were found to be differentially expressed in quantitative  
385 proteomics and referred as DASDP. Amongst these, none of them were shared with  
386 DEP dataset (Fig. 4C). Similar to previous parallel analysis (Bai et al., 2015;  
387 Marmioli et al., 2015), much less overlap was observed between DEP and DEG, DAS  
388 and DASP as well as DEP and DASDP (Fig. 4A-C). Only 11 genes were identified as  
389 both DEG and DEP with low correlation ( $R^2=0.18$ ) of their expression levels (Fig. 4D,  
390 E), suggesting the existence of post-transcriptional regulation for most of the  
391 transcripts. Although 2 genes were detected in both DAS and DASP datasets, the  
392 expression of their transcripts and proteins were at the same trend (Fig. 4F), indicating  
393 that quantification at AS isoform level may provide more accurate data representation  
394 for both transcripts and proteins than conventional quantification method used in RNA  
395 seq and proteomics. However, more data is required to confirm this hypothesis. In  
396 addition to the effect of post-transcription, the low overlap of DEP/DASDP with  
397 DEG/DAS datasets may be explained by the relatively low throughput and coverage  
398 of the MS-based proteomic method.

399

400 **Construction of a customized protein library leads to novel proteins**  
401 **identification and quantification during rice hypoxic germination**

402 Similar to previous findings (Zhu et al., 2017), the spectra usage for protein

403 identification was approximately 40-50% in this study (Fig. 5A) using both UniProt  
404 and AS junction libraries as input files. An increasing number of publications suggest  
405 that single transcripts are able to be translated into multiple proteins by using  
406 alternative translation initiation (ATI) sites (Brar and Weissman, 2015). This indicates  
407 that a large number of novel proteins or short peptides are yet to be identified, and this  
408 is caused by incomplete genome annotation (Kim et al., 2014). Thus, a 6-frame  
409 translation library was constructed using the combination of assembled cufflink files  
410 during RNA seq analysis and reference annotation files based on previously published  
411 methods (Castellana et al., 2008; Zhu et al., 2017). The outcomes from the database  
412 searching identified thousands of novel proteins and peptides, with 74.6% of proteins  
413 longer than 80 amino acids (a. a.), 24.0% of proteins/peptides from 11-80 amino acids  
414 and 1.4% of peptides from 6-11 amino acids (Fig. 5B, C). Among these, 2294 / 1432  
415 novel proteins (> 80 a.a.) and 310 / 774 novel proteins or peptides (6-80 a. a.) were  
416 identified in control / hypoxia-treated samples, respectively (Fig. 5D). This  
417 observation provides further evidence of increment coding ability for proteins and  
418 short peptides by using ATI sites. Additionally, an increasing number of short peptides  
419 (774) were detected in hypoxia-treated samples in comparison to air controls (310),  
420 suggesting that short peptides may play an important role in response to hypoxia  
421 during rice germination. Intriguingly, 137 novel proteins were quantified at a second  
422 frame of known transcripts. Few of these overlapped with DEG and DEP datasets,  
423 indicating that most of these proteins can only be detected by proteomic analysis  
424 using the customized library. This set of genes served as a source of novel candidates  
425 for further investigation of hypoxic responses during rice germination.

426

427 **The conventional 5'-splicing sites are less conserved in rice seeds at normal**  
428 **condition and under hypoxia treatment**



429 To further investigate the splicing characteristics between total AS and  
430 hypoxia-affected DAS datasets, statistical analysis of splicing sites (ss) conservation  
431 was performed. Conventionally, U2-type splicing sites (5'-GT-AG-3') are conserved  
432 and account for 90% of total splicing sites among plant species (Will and Luhrmann,  
433 2011). In this study, the 3'-splicing site (AG) was relatively conserved and accounted  
434 for over 80% in both control and hypoxia-treated samples (Fig. 6A). An extra 'C' was  
435 identified as a conserved sequence in both AS and DAS datasets (Fig. 6B). Thus,  
436 3'-splicing sites were identified as 'CAG' in rice seeds, and the hypoxia treatment did  
437 not change this signature (Fig. 6B). However, there was a decrease in the 'AG'  
438 proportion in hypoxia-treated samples, which was associated with the increase in the  
439 proportions of several other ss sequences especially 'AC'. In contrast, the  
440 conventional 5'-splicing site (GT) accounted for only 50% of total AS and was  
441 increased to approximately 60% in the hypoxia-affected DAS dataset (Fig. 6A).  
442 Meanwhile, non-conventional 5'-splicing sites such as 'AA' and 'CT' was largely  
443 reduced in the DAS dataset by comparing with AS dataset, suggesting its role in  
444 response to hypoxia stress (Fig. 6A). In addition, similar results were obtained by  
445 conservation analysis; 'GGT' signature was obtained in both AS and DAS datasets  
446 (Fig. 6B). Further investigation of ss among AS types demonstrated that AFE was  
447 responsible for the 'GT' reduction in both AS and DAS datasets (Supplemental Fig. 5).  
448 Although 3'-ss were more conserved, certain types of non-conventional splicing sites  
449 were induced among the specific AS types in the DAS dataset in comparison to the  
450 AS dataset such as 3'-TG and 3'-TT in AE5', 3'-AC and 3'-GG in AE3', 3'-GC and  
451 3'-TG in IR and 3'-GC in SKIP (Supplemental Fig. 5). This result indicates that the  
452 AS regulation under hypoxia stress may be caused by alternative recognition of  
453 sequence of splicing sites.

454

## 455 **Splicing factors are enriched in differentially expressed AS events**

456 To further understand the underlying mechanism of DAS regulation under hypoxia  
457 stress, splicing factors in rice were summarized and subjected to further analysis.  
458 Three genes were found in the DEG dataset (Fig. 7A). In contrast, a total of 105 AS  
459 events from 21 splicing factor-related proteins were observed in the DAS dataset (Fig.  
460 7A, B), and none of them were found in the DEG dataset. Among these, 60 AS events  
461 were up-regulated, whereas 45 AS events were down-regulated (Fig. 7B). In detail,  
462 43.8% of AS events were AFE and ALE accounting for 28.6% (Fig. 7C). The  
463 remaining three AS types accounted for 27.7% of the total AS events (Fig. 7C).  
464 According to the classification in the splicing-related gene database (SRGD,  
465 <http://www.plantgdb.org/SRGD/index.php>), the 21 genes observed in the DAS dataset  
466 were classified into 11 subgroups (Fig. 7D) from core splicing components to  
467 auxiliary factors. And those SFs enriched in KEGG term of spliceosome (Fig. 1C)  
468 were chosen for qRT-PCR validation (Fig. 7E). Some isoforms of selected SFs were  
469 differentially expressed under hypoxia treatment, suggesting that the change of AS in  
470 splicing components may be crucial in response to hypoxia stress during rice  
471 germination.

472

## 473 **Discussion**

### 474 **The discovery of a hidden network of AS in response to hypoxic stress during** 475 **rice germination provides additional targets in the study of hypoxia**

476 Alternative splicing produces multiple RNA isoforms for each locus. Each isoform  
477 may encode one protein isoform as well, which greatly expands the genome coding  
478 ability. Additionally, the discovery of two new AS types, AFE and ALE, has revealed  
479 the great potential to generate AS isoforms (Yan and Marr, 2005; de Klerk and t Hoen,  
480 2015; Zhu et al., 2017). In this study, approximately 97.2% (787/810) of the DAS

481 genes had no differences at the gene expression level, suggesting AS control of  
482 transcripts is completely separated from the conventional DEG group (Fig. 1B).  
483 Moreover, increasing evidence reveals that protein isoforms generated by AS  
484 transcripts have the ability to alter protein subcellular localization, protein-protein  
485 interaction networks and protein stability due to the presence or absence of certain  
486 motifs (Buljan et al., 2012; Ellis et al., 2012). Thus, the 667 AS peptides identified in  
487 both control and hypoxia-treated samples provided protein evidence of AS transcripts  
488 and may serve as good candidates for further functional characterization (Fig. 3A, B).  
489 These genes were distributed in a variety of biological pathways, including amino  
490 acid biosynthesis, ribosome and proteasome pathway, pantothenate and CoA  
491 biosynthesis and oxidative phosphorylation, and were not selected for further  
492 investigation by the first round of screening using DEG as criteria amongst large scale  
493 transcriptome analysis, suggesting that AS responses are embedded in various  
494 biochemical processes under hypoxia stress.

495 Transcriptomic studies have shown that low oxygen induces a myriad of gene  
496 responsiveness in terms of transcript abundance (Lasanthi-Kudahettige et al., 2007;  
497 Narsai et al., 2009; Narsai et al., 2011; Sadiq et al., 2011; Narsai et al., 2015; Hsu and  
498 Tung, 2017). Accordingly, transcriptional regulation in oxygen sensing pathways has  
499 been extensively studied in plants. Key regulators, such as ERFVII transcription  
500 factors, have been substantially characterized (Fukao et al., 2009; Hattori et al., 2009;  
501 Hinz et al., 2010; Licausi et al., 2010). However, few studies have been carried out to  
502 unravel the AS regulation under hypoxia. In the current study, AS analysis indicates  
503 that the conventional splicing sites are not conserved at the 5' position in rice seeds  
504 (Fig. 6A, B and Supplemental Fig. 5). Major regulators defined as splicing factors  
505 within assembled spliceosome have been characterized to participate in AS site  
506 determination (Golovkin and Reddy, 1996; Kalyna et al., 2006; Krummel et al., 2009;

507 Will and Luhrmann, 2011; Kondo et al., 2015; Yoshida et al., 2015). Although several  
508 splicing factors have been reported to be involved in stress responses (Ruhl et al.,  
509 2012; Feng et al., 2015), none of them are related to hypoxia responses. In our results,  
510 a 7-fold increase in the number of splicing factors (21 in DAS to 3 in DEG) were  
511 found in comparison to the DEG dataset (Fig. 7), suggesting the importance of those  
512 proteins in splicing site recognition. Over 100 AS events in these 21 splicing factors  
513 were affected during hypoxia treatment, which may greatly alter the protein isoforms  
514 of these proteins in comparison to the control group. Subsequently, hypoxia may  
515 change the composition and conformation of spliceosomes by recruiting different  
516 protein isoforms of splicing factors, which may in turn lead to a different choice of  
517 splicing site sequence recognition. This may explain the increment of the proportion  
518 of certain non-conventional splicing sites during rice hypoxic germination  
519 (Supplemental Fig. 5). Furthermore, the integration of qualitative proteomic data  
520 implies that hypoxia-responsive AS events are more likely to be translated in  
521 comparison to non-responsive ones (Fig. 3B, lower panel), providing protein evidence  
522 for the potential role of these AS isoforms in response to hypoxia stress. Therefore,  
523 our results suggest that alternative splicing is an independent pathway other than  
524 transcriptional repression in response to hypoxia during rice germination. The  
525 majority of members in this pathway remain to be elucidated.

526

### 527 **Alternative cellular pathways are activated by AS under hypoxia treatment**

528 Several pathways were found to be over-represented under AS-mediated responses  
529 during rice hypoxic germination. mRNA surveillance, such as NMD, has long been  
530 demonstrated to play an important role in controlling mRNA stability and abundance  
531 before translation (Nicholson et al., 2010; Drechsel et al., 2013). It has been reported  
532 that NMD is closely related to exon junction complex (EJC) of splicing machinery in

533 both animals and plants (Shaul, 2015). In Arabidopsis, hypoxia-responsive ERFs,  
534 HRE1 and HRE2, have been proposed to be likely regulated by post-transcriptional  
535 mechanisms for their mRNA stability (Licausi et al., 2010). From our dataset,  
536 isoforms of several components belong to EJC complex (*e.g.* Os08g0305300,  
537 *OsSMG7* and Os05g0140500, *OsY14a*) were observed to be differentially regulated  
538 (Nyikó et al., 2013), indicating their potential function in surveillance of newly  
539 spliced RNA isoforms under hypoxia. Evidence shows that the status of spliceosome  
540 will be affected under hypoxia in animal tissues (Schmidtkastner et al., 2008).  
541 Splicing factors like serine-arginine (SR) proteins is activated under hypoxic  
542 condition by phosphorylation (Jakubauskiene et al., 2015). However, the  
543 responsiveness of spliceosome under hypoxia treatment remains to be elucidated *in*  
544 *planta*. In this study, a variety of splicing components have been identified to show  
545 differential expression under hypoxia treatment. Among these, six isoforms from two  
546 SR proteins (Os03g0344100, *SR32* and Os02g0610600, *RSZ23*) were induced by  
547 hypoxia treatment (Fig. 7E). Although multiple isoforms of SR proteins have been  
548 detected in different rice tissues (Peng et al., 2013), no evidence links them to hypoxia  
549 stress responsiveness before. Here, we hypothesize that SF changes under hypoxia is  
550 crucial for downstream AS regulation under hypoxia. However, less information can  
551 be found by annotation and datamining of these SFs that we have identified in this  
552 study. Further functional characterization is required to confirm their roles in response  
553 to hypoxia. Besides post-transcriptional regulatory pathways, processes related to  
554 protein export, lysosome and proteasome were observed to play a role during hypoxic  
555 germination (Figs. 1 and 2). The enhancement of some splicing isoforms in protein  
556 export process (Fig. 2C) may effectively help plants to survive during hypoxia  
557 conditions. Furthermore, lysosome is a place where cell to recycle building materials  
558 or detoxification (Chen et al., 2015). Recent study shows that hypoxia may rapidly

559 induce autophagy, which is a highly conserved mechanism in eukaryotes to target  
560 cellular components to lysosome for recycling purpose (Chen et al., 2015). Thus, the  
561 newly formed isoforms of lysosomal gene may be responsible for the survival under  
562 hypoxia stress. Similarly, protein degradation has been considered as a major  
563 responsive mechanism in response to hypoxia in both animals and plants (Huang et al.,  
564 1998; Gibbs et al., 2011; Licausi et al., 2011). Significant protein will be degraded as  
565 an alternative energy source and remodelling during hypoxia treatment. Isoforms  
566 formed in this process may efficiently degrade misfolded proteins for synthesis of  
567 proteins isoforms that can confer hypoxia tolerance. Intriguingly, transcriptional  
568 regulation focused on the control of cellular metabolic levels and growth factors,  
569 whereas alternative splicing aims to produce new protein isoforms that is mainly  
570 involved in degradation, post-transcriptional regulation and transport processes. These  
571 two complementary mechanisms may facilitate rice seeds to survive under hypoxia  
572 during germination.

573

574 **Thousands of novel proteins or peptides resulting from alternative translation**  
575 **participate in the hypoxia response during rice germination**

576 In addition to AS-resulting protein diversity, proteins encoded from a second frame of  
577 the same transcript or from annotated non-coding regions contribute to genome  
578 coding ability as well (Jensen et al., 2013; Wade and Grainger, 2014). Specifically, a  
579 considerable number of unannotated proteins were detected using a customized  
580 library by six-frame translation (*i.e.*, 3 in the forward strand and 3 in the reverse  
581 complement strand). The coding ability of one transcript using a second frame has  
582 been widely studied in animals but is rarely reported in plants (de Klerk and t Hoen,  
583 2015). One example from plant systems is an alpha-enolase gene (*LOS2*) in  
584 Arabidopsis that encodes an MBP-like protein by alternative translation. This

585 MBP-like protein affects ABA responses and its protein level is regulated by E3 ligase  
586 SAP5 (Kang et al., 2013). Furthermore, the existence of uORFs in the 5'-untranslated  
587 regions of certain transcripts may lead to a feedback regulation of translation  
588 efficiency (Laing et al., 2015). From our results, a total of 2,660 putative proteins over  
589 80 amino acids and 904 proteins/peptides ranging from 6 to 80 amino acids have been  
590 identified (Fig. 5D). A total of 960 of these proteins/peptides were specifically  
591 induced under hypoxia treatment, suggesting that they are new players involved in  
592 hypoxia responses. Furthermore, a total of 137 novel proteins were quantified by  
593 proteomic analysis, 128 of which were not present in the DEG and DEP lists (Fig. 5E),  
594 demonstrating that the usage of a customized library combined with quantitative  
595 proteomics is essential for this kind of novel protein/peptide identification.

596

### 597 **Proteogenomic approach evolves as a new generation method to analyse** 598 **omics-based datasets**

599 Large profiling methods have been applied in plant research to study various  
600 developmental processes or stress responses. However, individual approaches such as  
601 transcriptome or proteome analysis are restricted by their defects in experimental  
602 conditions and analytical pipelines. For example, pure transcriptome analysis is  
603 affected by the corresponding reference genome annotation. Pure proteomic methods  
604 are limited by currently available protein libraries, which were generated based on  
605 incomplete genome information (Zhu et al., 2017). Thus, proteogenomics, a method  
606 incorporating transcriptomic and proteomic datasets, represents a new generation of  
607 analytical approaches for deeper understanding of the functional importance of  
608 potential genome coding ability (Castellana et al., 2008; Kumar et al., 2016). First,  
609 this analytical approach is able to determine which AS isoforms will be translated into  
610 proteins and thus can differentiate between mRNA degradation regulation and

611 translational control (Nicholson et al., 2010; Drechsel et al., 2013). Second, in  
612 combination with quantitative proteomics, proteogenomic analysis links the protein  
613 evidence to their transcript changes to give an accurate footprint for each transcript  
614 isoform during the analysis. Low correlation of the expression levels between proteins  
615 and transcripts will be improved when using this type of analytical pipeline (Fig. 4D,  
616 E). This in turn will reveal valuable targets that are truly regulated at transcript and  
617 protein levels in the same trend. At last, coupled with a self-constructed protein library,  
618 this method enhances the identification of novel proteins/peptides (Fig. 5) that are  
619 potential hidden regulatory components in plant development or stress responses.  
620 However, this approach can be further improved from its current version. For example,  
621 using strand-specific library construction in short-read RNA seq analysis can enhance  
622 the accuracy and reduce redundancy of subsequent protein library construction.  
623 Furthermore, using the 3<sup>rd</sup> generation of sequencing methods, such as single molecule  
624 long-read sequencing, can aid in the precise identification of full-length transcripts for  
625 accurate AS identification (Zhu et al., 2017). In addition, the low overlap between  
626 DEG and DEP or DAS and DASP can be improved by increasing the throughput and  
627 coverage of proteomic analysis. The incorporation of SWATH (sequential window  
628 acquisition of all theoretical spectra-mass spectrometry)-based quantitative  
629 proteomics (Zhu et al., 2016; Zhu et al., 2016) and two or more enzyme digestion  
630 steps may achieve better results than those of the current study.

631

## 632 **CONCLUSION**

633 In conclusion, this study expands our understanding of the genome coding ability  
634 of rice under hypoxic germination. Two post-transcriptional mechanisms, alternative  
635 splicing and alternative translation initiation, have major contributions to protein  
636 diversity during hypoxia (Figure 8). Alternative splicing may function in parallel with



637 transcriptional control in response to hypoxia stress during rice germination.  
638 Specifically, low oxygen conditions extensively affect AS and ATI patterns in parallel  
639 with conventional transcriptional regulation during rice germination. The  
640 compositional change of spliceosomes may result in the preferred usage of  
641 non-canonical splicing sites under hypoxia treatment. In this case, the conservation of  
642 5'-splicing sites was largely affected by the hypoxia treatment. In addition,  
643 hypoxia-affected DAS events were more likely undergo protein translation in  
644 comparison to AS events identified under normal conditions. The above results  
645 indicate the existence of a large underground network of hypoxia responses at the  
646 post-transcriptional level. This newly discovered underlying response mechanism is  
647 mediated by AS and ATI. The members of this network need to be further  
648 characterized. This case study using hypoxic germination as a model demonstrates  
649 how modern technology and bioinformatic analysis improves our understanding of the  
650 plant genome coding ability and its features during stress responses.

651

## 652 **Supplemental Data**

653 **Supplemental Fig. 1.** Analytical pipeline of AS identification, quantification and  
654 validation in this study.

655 **Supplemental Fig. 2.** Comparison of previous published datasets and qRT PCR  
656 validation.

657 **Supplemental Fig. 3.** GO enrichment analysis between DAS and DEG datasets from  
658 RNA sequencing.

659 **Supplemental Fig. 4.** qRT-PCR validation of selected genes from DAS events.

660 **Supplemental Fig. 5.** Comparison of splicing sites (ss) recognition between AS and  
661 DAS events.

662

663 **Supplemental Table 1.** Summary of the basic parameters in RNA sequencing dataset.

664 **Supplemental Table 2.** List of differentially expressed genes.

665 **Supplemental Table 3.** List of the differentially expressed AS events.

666 **Supplemental Table 4.** Summary of quantified proteins in proteomic analysis.

667 **Supplemental Table 5.** Primers used in this study.

668

## 669 **ACKNOWLEDGMENTS**

670 This work was supported by the Natural Science Foundation of Shandong Province  
671 (BS2015NY002), Funds of Shandong “Double Top” Program, Natural Science  
672 Foundation of China (NSFC31101099), the China Postdoctoral Science Foundation  
673 (2017M622801), Science and Technology Program of Nantong (MS12016044), the  
674 National Natural Science Foundation of China (NSFC31101099, 31771701,  
675 31701341), Innovative Training Program of Nantong University College Students  
676 2017 (201710304049Z), National Key Basic Research Program of China  
677 (2012CB114300), the Natural Science Foundation of Guangdong Province  
678 (2014A030313794), Shenzhen Overseas Talents Innovation and Entrepreneurship  
679 Funding Scheme (The Peacock Scheme, KQTD201101) and Hong Kong Research  
680 Grant Council (AoE/M-05/12, AoE/M-403/16, CUHK 14122415, 14160516,  
681 14177617).

682

## 683 **AUTHOR CONTRIBUTIONS**

684 M.X.C., F.Y.Z., J.H.Z., Y.G.L. designed experiments. M.X.C., F.Y.Z., F.Z.W., N.H.Y.,  
685 T.F., Y.Y.C., T.Y.L. S.S.Z performed experiments. M.X.C., F.Y.Z., B.G., K.L.M.,  
686 G.Y.F., Z.Z.S., L.J.X., Q.J.H., H.J.W. analysed data. F.Y.Z., M.X.C., N.H.Y. wrote the  
687 manuscript. S.X., J.H.Z., Y.G.L. critically commented and revised it.

688

689 **COMPETING FINANCIAL INTERESTS**

690 The authors declare no competing financial interests.

691

692 **REFERENCES**

693 **Alfaro JA, Sinha A, Kislinger T, Boutros PC** (2014) Onco-proteogenomics: cancer proteomics joins  
694 forces with genomics. *Nat Methods* **11**: 1107-1113

695 **Andreassi C, Riccio A** (2009) To localize or not to localize: mRNA fate is in 3' UTR ends. *Trends Cell*  
696 *Biol* **19**: 465-474

697 **Andrews GL, Simons BL, Young JB, Hawkridge AM, Muddiman DC** (2011) Performance  
698 characteristics of a new hybrid quadrupole time-of-flight tandem mass spectrometer  
699 (TripleTOF 5600). *Anal Chem* **83**: 5442-5446

700 **Atwell BJ, Greenway H, Colmer TD** (2015) Efficient use of energy in anoxia-tolerant plants with  
701 focus on germinating rice seedlings. *New Phytol* **206**: 36-56

702 **Bai Y, Wang S, Zhong H, Yang Q, Zhang F, Zhuang Z, Yuan J, Nie X, Wang S** (2015) Integrative  
703 analyses reveal transcriptome-proteome correlation in biological pathways and secondary  
704 metabolism clusters in *A. flavus* in response to temperature. *Sci Rep***5**: 14582

705 **Berta M, Ismail AM** (2013) Tolerance of anaerobic conditions caused by flooding during germination  
706 and early growth in rice (*Oryza sativa*L.). *Front Plant Sci* **4**: 269

707 **Brar GA, Weissman JS** (2015) Ribosome profiling reveals the what, when, where and how of protein  
708 synthesis. *Nat Rev Mol Cell Biol* **16**: 651-664.

709 **Buljan M, Chalancon G, Eustermann S, Wagner GP, Fuxreiter M, Bateman A, Babu MM** (2012)  
710 Tissue-specific splicing of disordered segments that embed binding motifs rewires protein  
711 interaction networks. *Mol Cell* **46**: 871-883

712 **Castellana NE, Payne SH, Shen Z, Stanke M, Bafna V, Briggs SP** (2008) Discovery and revision of  
713 *Arabidopsis* genes by proteogenomics. *Proc Natl Acad Sci U S A* **105**: 21034-21038

714 **Castellana NE, Shen Z, He Y, Walley JW, Cassidy CJ, Briggs SP, Bafna V** (2014) An automated  
715 proteogenomic method uses mass spectrometry to reveal novel genes in *Zea mays*. *Mol Cell*  
716 *Proteomics* **13**: 157-167

717 **Chang CY, Lin WD, Tu SL** (2014) Genome-Wide Analysis of Heat-Sensitive Alternative Splicing in  
718 *Physcomitrella patens*. *Plant Physiol* **165**: 826-840

719 **Chang R, Jang CJ, Branco-Price C, Nghiem P, Bailey-Serres J** (2012) Transient MPK6 activation in  
720 response to oxygen deprivation and reoxygenation is mediated by mitochondria and aids  
721 seedling survival in *Arabidopsis*. *Plant Mol Biol* **78**: 109-122

722 **Chen L, Liao B, Qi H, Xie LJ, Huang L, Tan WJ, Zhai N, Yuan LB, Zhou Y, Yu LJ** (2015)  
723 Autophagy contributes to regulation of the hypoxia response during submergence in  
724 *Arabidopsis thaliana*. *Autophagy* **11**: 2233-2246

725 **Chen X, Chan WL, Zhu FY, Lo C** (2014) Phosphoproteomic analysis of the non-seed vascular plant

- 726 model *Selaginella moellendorffii*. *Proteome Sci* **12**: 16
- 727 **Crooks GE, Hon G, Chandonia JM, Brenner SE** (2004) WebLogo: a sequence logo generator.  
728 *Genome Res* **14**: 1188-1190
- 729 **de Klerk E, t Hoen PA** (2015) Alternative mRNA transcription, processing, and translation: insights  
730 from RNA sequencing. *Trends Genet* **31**: 128-139
- 731 **De LL, Sorenson R, Baileyserres J, Hunt AG** (2017) Noncanonical Alternative Polyadenylation  
732 Contributes to Gene Regulation in Response to Hypoxia. *Plant Cell*: **29**: 1262-1277
- 733 **Drechsel G, Kahles A, Kesarwani AK, Stauffer E, Behr J, Drewe P, Rättsch G, Wachter A** (2013)  
734 Nonsense-mediated decay of alternative precursor mRNA splicing variants is a major  
735 determinant of the Arabidopsis steady state transcriptome. *Plant Cell* **25**: 3726-3742
- 736 **Eckardt NA** (2013) The plant cell reviews alternative splicing. *Plant Cell* **25**: 3639
- 737 **Ellis JD, Barrios-Rodiles M, Colak R, Irimia M, Kim T, Calarco JA, Wang X, Pan Q, O'Hanlon**  
738 **D, Kim PM, et al.** (2012) Tissue-specific alternative splicing remodels protein-protein  
739 interaction networks. *Mol Cell* **46**: 884-892
- 740 **Feng J, Li J, Gao Z, Lu Y, Yu J, Zheng Q, Yan S, Zhang W, He H, Ma L, et al.** (2015) SKIP  
741 Confers Osmotic Tolerance during Salt Stress by Controlling Alternative Gene Splicing in  
742 Arabidopsis. *Mol Plant* **8**: 1038-1052
- 743 **Fesenko I, Khazigaleeva R, Kirov I, Kniazev A, Glushenko O, Babalyan K, Arapidi G, Shashkova**  
744 **T, Butenko I, Zgoda V** (2017) Alternative splicing shapes transcriptome but not proteome  
745 diversity in *Physcomitrella patens*. *Sci Rep* **7**: 2698
- 746 **Florea L, Song L, Salzberg SL** (2013) Thousands of exon skipping events differentiate among  
747 splicing patterns in sixteen human tissues. *F1000Research* **2**: 188
- 748 **Fukao T, Harris T, Baileyserres J** (2009) Evolutionary analysis of the Sub1 gene cluster that confers  
749 submergence tolerance to domesticated rice. *Ann Bot* **103**: 143-150
- 750 **Gibbs DJ, Lee SC, Isa NM, Gramuglia S, Fukao T, Bassel GW, Correia CS, Corbineau F,**  
751 **Theodoulou FL, Bailey-Serres J** (2011) Homeostatic response to hypoxia is regulated by the  
752 N-end rule pathway in plants. *Nature* **479**: 415-418
- 753 **Gibbs DJ, Lee SC, Isa NM, Gramuglia S, Fukao T, Bassel GW, Correia CS, Corbineau F,**  
754 **Theodoulou FL, Baileyserres J** (2011) Homeostatic response to hypoxia is regulated by the  
755 N-end rule pathway in plants. *Nature* **479**: 415-418
- 756 **Giuntoli B, Licausi F, Van VH, Perata P** (2017) Functional Balancing of the Hypoxia Regulators  
757 RAP2.12 and HRA1 Takes Place in vivo in Arabidopsis thaliana Plants. *Front Plant Sci* **8**: 591
- 758 **Golovkin M, Reddy AS** (1996) Structure and expression of a plant U1 snRNP 70K gene: alternative  
759 splicing of U1 snRNP 70K pre-mRNAs produces two different transcripts. *Plant Cell* **8**:  
760 1421-1435
- 761 **Hattori Y, Nagai K, Furukawa S, Song XJ, Kawano R, Sakakibara H, Wu J, Matsumoto T,**  
762 **Yoshimura A, Kitano H** (2009) The ethylene response factors SNORKEL1 and SNORKEL2  
763 allow rice to adapt to deep water. *Nature* **460**: 1026-1030

- 764 **He D, Zhang H, Yang P** (2014) The Mitochondrion-Located Protein OsB12D1 Enhances Flooding  
765 Tolerance during Seed Germination and Early Seedling Growth in Rice. *Int J Mol Sci* **15**:  
766 13461-13481
- 767 **Hinz M, Wilson IW, Yang J, Buerstenbinder K, Llewellyn D, Dennis ES, Sauter M, Dolferus R**  
768 (2010) Arabidopsis RAP2.2: an ethylene response transcription factor that is important for  
769 hypoxia survival. *Plant Physiol* **153**: 757-772
- 770 **Hsu SK, Tung CW** (2017) RNA-Seq Analysis of Diverse Rice Genotypes to Identify the Genes  
771 Controlling Coleoptile Growth during Submerged Germination. *Front Plant Sci* **8**: 762
- 772 **Huang LE, Gu J, Schau M, Bunn HF** (1998) Regulation of hypoxia-inducible factor 1 $\alpha$  is  
773 mediated by an O<sub>2</sub>-dependent degradation domain via the ubiquitin-proteasome pathway. *Proc*  
774 *Natl Acad Sci U S A* **95**: 7987-7992
- 775 **Ingolia NT, Lareau LF, Weissman JS** (2011) Ribosome profiling of mouse embryonic stem cells  
776 reveals the complexity and dynamics of mammalian proteomes. *Cell* **147**: 789-802
- 777 **Jakubauskiene E, Vilys L, Makino Y, Poellinger L, Kanopka A** (2015) Increased Serine-Arginine  
778 (SR) Protein Phosphorylation Changes Pre-mRNA Splicing in Hypoxia. *J Biol Chem* **290**:  
779 18079-18089
- 780 **James AB, Syed NH, Bordage S, Marshall J, Nimmo GA, Jenkins GI, Herzyk P, Brown JW,**  
781 **Nimmo HG** (2012) Alternative splicing mediates responses of the Arabidopsis circadian clock  
782 to temperature changes. *Plant Cell* **24**: 961-981
- 783 **Jenal M, Elkon R, Loayza-Puch F, van Haaften G, Kuhn U, Menzies FM, Oude Vrielink JA, Bos**  
784 **AJ, Drost J, Rooijers K, et al.** (2012) The poly(A)-binding protein nuclear 1 suppresses  
785 alternative cleavage and polyadenylation sites. *Cell* **149**: 538-553
- 786 **Jensen TH, Jacquier A, Libri D** (2013) Dealing with pervasive transcription. *Mol Cell* **52**: 473-484
- 787 **Kalyna M, Lopato S, Voronin V, Barta A** (2006) Evolutionary conservation and regulation of  
788 particular alternative splicing events in plant SR proteins. *Nucleic Acids Res* **34**: 4395-4405
- 789 **Kang M, Abdelmageed H, Lee S, Reichert A, Mysore KS, Allen RD** (2013) AtMBP $\square$ 1, an  
790 alternative translation product of LOS2, affects abscisic acid responses and is modulated by  
791 the E3 ubiquitin ligase AtSAP5. *Plant J* **76**: 481-493
- 792 **Kim MS, Pinto SM, Getnet D, Nirujogi RS, Manda SS, Chaerkady R, Madugundu AK, Kelkar**  
793 **DS, Isserlin R, Jain S, et al.** (2014) A draft map of the human proteome. *Nature* **509**: 575-581
- 794 **Kondo Y, Oubridge C, van Roon AM, Nagai K** (2015) Crystal structure of human U1 snRNP, a small  
795 nuclear ribonucleoprotein particle, reveals the mechanism of 5' splice site recognition. *Elife* **4**:  
796 e04986
- 797 **Kretschmar T, Pelayo MAF, Trijatmiko KR, Gabunada LFM, Alam R, Jimenez R, Mendioro**  
798 **MS, Slametloedin IH, Sreenivasulu N, Baileyserres J** (2015) A trehalose-6-phosphate  
799 phosphatase enhances anaerobic germination tolerance in rice. *Nat Plants* **1**: 15124
- 800 **Krummel DAP, Oubridge C, Leung AK, Li J, Nagai K** (2009) Crystal structure of human  
801 spliceosomal U1 snRNP at 5.5 Å resolution. *Nature* **458**: 475-480

- 802 **Kumar D, Yadav AK, Jia X, Mulvenna J, Dash D** (2016) Integrated transcriptomic-proteomic  
803 analysis using a proteogenomic workflow refines rat genome annotation. *Mol Cell Proteomics*  
804 **15**: 329-339
- 805 **Laing WA, Martínez-sánchez M, Wright MA, Bulley SM, Brewster D, Dare AP, Rassam M, Wang**  
806 **D, Storey R, Macknight RC** (2015) An upstream open reading frame is essential for feedback  
807 regulation of ascorbate biosynthesis in *Arabidopsis*. *Plant Cell* **27**: 772-786
- 808 **Lasanthi-Kudahettige R, Magneschi L, Loreti E, Gonzali S, Licausi F, Novi G, Beretta O, Vitulli F,**  
809 **Alpi A, Perata P** (2007) Transcript profiling of the anoxic rice coleoptile. *Plant Physiol* **144**:  
810 218-231
- 811 **Lee KW, Chen PW, Lu CA, Chen S, Ho TH, Yu SM** (2009) Coordinated responses to oxygen and  
812 sugar deficiency allow rice seedlings to tolerate flooding. *Sci Signal* **2**: ra61
- 813 **Lee S, Liu B, Lee S, Huang S-X, Shen B, Qian S-B** (2012) Global mapping of translation initiation  
814 sites in mammalian cells at single-nucleotide resolution. *Proc Natl Acad Sci U S A* **109**:  
815 2424-2432
- 816 **Licausi F, Kosmacz M, Weits DA, Giuntoli B, Giorgi FM, Voeselek LA, Perata P, van Dongen JT**  
817 (2011) Oxygen sensing in plants is mediated by an N-end rule pathway for protein  
818 destabilization. *Nature* **479**: 419-422
- 819 **Licausi F, Van Dongen JT, Giuntoli B, Novi G, Santaniello A, Geigenberger P, Perata P** (2010)  
820 HRE1 and HRE2, two hypoxia-inducible ethylene response factors, affect anaerobic responses  
821 in *Arabidopsis thaliana*. *Plant J* **62**: 302-315
- 822 **Lu CA, Lin CC, Lee KW, Chen JL, Huang LF, Ho SL, Liu HJ, Hsing YI, Yu SM** (2007) The  
823 SnRK1A protein kinase plays a key role in sugar signaling during germination and seedling  
824 growth of rice. *Plant Cell* **19**: 2484-2499
- 825 **Marmiroli M, Imperiale D, Pagano L, Villani M, Zappettini A, Marmiroli N** (2015) The Proteomic  
826 Response of *Arabidopsis thaliana* to Cadmium Sulfide Quantum Dots, and Its Correlation with  
827 the Transcriptomic Response. *Front Plant Sci* **6**: 1104
- 828 **Narsai R, Edwards JM, Roberts TH, Whelan J, Joss GH, Atwell BJ** (2015) Mechanisms of growth  
829 and patterns of gene expression in oxygen-deprived rice coleoptiles. *Plant J* **82**: 25-40
- 830 **Narsai R, Howell KA, Carroll A, Ivanova A, Millar AH, Whelan J** (2009) Defining core metabolic  
831 and transcriptomic responses to oxygen availability in rice embryos and young seedlings.  
832 *Plant Physiology* **151**: 306-322
- 833 **Narsai R, Rocha M, Geigenberger P, Whelan J, Dongen JTV** (2011) Comparative analysis between  
834 plant species of transcriptional and metabolic responses to hypoxia. *New Phytol* **190**: 472-487
- 835 **Nicholson P, Yepiskoposyan H, Metze S, Zamudio Orozco R, Kleinschmidt N, Muhlemann O**  
836 (2010) Nonsense-mediated mRNA decay in human cells: mechanistic insights, functions  
837 beyond quality control and the double-life of NMD factors. *Cell Mol Life Sci* **67**: 677-700
- 838 **Nyikó T, Kerényi F, Szabadkai L, Benkovics AH, Major P, Sonkoly B, Mérai Z, Barta E, Niemiec**  
839 **E, Kufel J** (2013) Plant nonsense-mediated mRNA decay is controlled by different

- 840 autoregulatory circuits and can be induced by an EJC-like complex. *Nucleic Acids Res* **41**:  
841 6715-6728
- 842 **Peng Z, Deng H, Xiao FM, Liu YS** (2013) Alterations of Alternative Splicing Patterns of  
843 Ser/Arg-Rich ( SR ) Genes in Response to Hormones and Stresses Treatments in Different  
844 Ecotypes of Rice (*Oryza sativa* ). *J Int Agri* **12**: 737-748
- 845 **Ruhl C, Stauffer E, Kahles A, Wagner G, Drechsel G, Ratsch G, Wachter A** (2012) Polypyrimidine  
846 tract binding protein homologs from Arabidopsis are key regulators of alternative splicing  
847 with implications in fundamental developmental processes. *Plant Cell* **24**: 4360-4375
- 848 **Sadiq I, Fanucchi F, Paparelli E, Alpi E, Bachi A, Alpi A, Perata P** (2011) Proteomic identification  
849 of differentially expressed proteins in the anoxic rice coleoptile. *J Plant Physiol* **168**:  
850 2234-2243
- 851 **Sasidharan R, Baileyserres J, Ashikari M, Atwell BJ, Colmer TD, Fagerstedt K, Fukao T,**  
852 **Geigenberger P, Hebelstrup KH, Hill RD** (2017) Community recommendations on  
853 terminology and procedures used in flooding and low oxygen stress research. *New Phytol* **214**:  
854 1403-1407
- 855 **Schmidtkastner R, Yamamoto H, Hamasaki D, Yamamoto H, Parel JM, Schmitz C, Dorey CK,**  
856 **Blanks JC, Preising MN** (2008) Hypoxia-regulated components of the U4/U6.U5 tri-small  
857 nuclear riboprotein complex: possible role in autosomal dominant retinitis pigmentosa. *Mol*  
858 *Vision* **14**: 125-135
- 859 **Shaul O** (2015) Unique Aspects of Plant Nonsense-Mediated mRNA Decay. *Trends Plant Sci* **20**:  
860 767-779
- 861 **Sheynkman GM, Shortreed MR, Frey BL, Smith LM** (2013) Discovery and mass spectrometric  
862 analysis of novel splice-junction peptides using RNA-Seq. *Mol Cell Proteomics* **12**:  
863 2341-2353
- 864 **Simon R, Dresselhaus T** (2015) Peptides take centre stage in plant signalling. *J Exp Bot* **66**:  
865 5135-5138
- 866 **Sonenberg N, Hinnebusch AG** (2009) Regulation of translation initiation in eukaryotes: mechanisms  
867 and biological targets. *Cell* **136**: 731-745
- 868 **Sonmez C, Baurle I, Magusin A, Dreos R, Laubinger S, Weigel D, Dean C** (2011) RNA 3'  
869 processing functions of Arabidopsis FCA and FPA limit intergenic transcription. *Proc Natl*  
870 *Acad Sci U S A* **108**: 8508-8513
- 871 **Tameshige T, Okamoto S, Lee JS, Aida M, Tasaka M, Torii K, Uchida N** (2016) A Secreted Peptide  
872 and Its Receptors Shape the Auxin Response Pattern and Leaf Margin Morphogenesis. *Curr*  
873 *Biol* **26**: 2478-2485
- 874 **Tavares R, Scherer NM, Ferreira CG, Costa FF, Passetti F** (2015) Splice variants in the proteome: a  
875 promising and challenging field to targeted drug discovery. *Drug Discov Today* **20**: 353-360
- 876 **Tavormina P, De CB, Nikonorova N, De SI, Cammue BP** (2015) The Plant Peptidome: An  
877 Expanding Repertoire of Structural Features and Biological Functions. *Plant Cell* **27**:



- 878 2095-2118
- 879 **Thatcher SR, Danilevskaya ON, Meng X, Beatty M, Zastrow-Hayes G, Harris C, Van Allen B,**  
880 **Habben J, Li B** (2016) Genome-Wide Analysis of Alternative Splicing during Development  
881 and Drought Stress in Maize. *Plant Physiol* **170**: 586-599
- 882 **Van VH, Vashisht D, Akman M, Girke T, Mustroph A, Reinen E, Hartman S, Kooiker M, Van TP,**  
883 **Schranz ME** (2016) Transcriptomes of Eight *Arabidopsis thaliana* Accessions Reveal Core  
884 Conserved, Genotype- and Organ-Specific Responses to Flooding Stress. *Plant Physiol* **172**:  
885 668-689
- 886 **Wade JT, Grainger DC** (2014) Pervasive transcription: illuminating the dark matter of bacterial  
887 transcriptomes. *Nat Rev Microbiol* **12**: 647-653
- 888 **Walley JW, Briggs SP** (2015) Dual use of peptide mass spectra: Protein atlas and genome annotation.  
889 *Curr Plant Biol* **2**: 21-24
- 890 **Wang Z, Ji H, Yuan B, Wang S, Su C, Yao B, Zhao H, Li X** (2015) ABA signalling is fine-tuned by  
891 antagonistic *HAB1* variants. *Nat Commun* **6**:8138
- 892 **Weits DA, Giuntoli B, Kosmacz M, Parlanti S, Hubberten HM, Riegler H, Hoefgen R, Perata P,**  
893 **Dongen JTV, Licausi F** (2014) Plant cysteine oxidases control the oxygen-dependent branch  
894 of the N-end-rule pathway. *Nat Commun* **5**: 3425
- 895 **Will CL, Luhrmann R** (2011) Spliceosome structure and function. *Cold Spring Harb Perspect Biol* **3**:  
896 a003707
- 897 **Xie LJ, Chen QF, Chen MX, Yu LJ, Huang L, Chen L, Wang FZ, Xia FN, Zhu TR, Wu JX** (2015)  
898 Unsaturation of very-long-chain ceramides protects plant from hypoxia-induced damages by  
899 modulating ethylene signaling in *Arabidopsis*. *PLoS Genet* **11**: e1005143
- 900 **Yan J, Marr TG** (2005) Computational analysis of 3'-ends of ESTs shows four classes of alternative  
901 polyadenylation in human, mouse, and rat. *Genome Res* **15**: 369-375
- 902 **Yang J, Zhang J** (2006) Grain filling of cereals under soil drying. *The New phytologist* **169**: 223-236
- 903 **Yang M, Xu L, Liu Y, Yang P** (2015) RNA-Seq Uncovers SNPs and Alternative Splicing Events in  
904 Asian Lotus (*Nelumbo nucifera*). *PLoS One* **10**: e0125702
- 905 **Yoshida H, Park SY, Oda T, Akiyoshi T, Sato M, Shirouzu M, Tsuda K, Kuwasako K, Unzai S,**  
906 **Muto Y, et al.** (2015) A novel 3' splice site recognition by the two zinc fingers in the U2AF  
907 small subunit. *Genes Dev* **29**: 1649-1660
- 908 **Yuan LB, Dai YS, Xie LJ, Yu LJ, Zhou Y, Lai YX, Yang YC, Xu L, Chen QF, Xiao S** (2017)  
909 Jasmonate Regulates Plant Responses to Reoxygenation through Activation of Antioxidant  
910 Synthesis. *Plant Physiol* **173**: 1864-1880
- 911 **Zdraviko J L, Reinhard L, Christina F, Andrea B** (2005) Evolutionary conservation of minor  
912 U12-type spliceosome between plants and humans. *RNA* **11**: 1095-1107
- 913 **Zhan X, Qian B, Cao F, Wu W, Yang L, Guan Q, Gu X, Wang P, Okusolubo TA, Dunn SL** (2015)  
914 An *Arabidopsis* PWI and RRM motif-containing protein is critical for pre-mRNA splicing and  
915 ABA responses. *Nature Commun* **6**:8139



- 916 **Zhou MT, Qin Y, Li M, Chen C, Chen X, Shu HB, Guo L** (2015) Quantitative Proteomics Reveals  
917 the Roles of Peroxisome-associated Proteins in Antiviral Innate Immune Responses. *Mol Cell*  
918 *Proteomics* **14**: 2535-2549
- 919 **Zhu FY, Chan WL, Chen MX, Kong RP, Cai C, Wang Q, Zhang JH, Lo C** (2016) SWATH-MS  
920 Quantitative Proteomic Investigation Reveals a Role of Jasmonic Acid during Lead Response  
921 in Arabidopsis. *J Proteome Res* **15**: 3528-3539
- 922 **Zhu FY, Chen MX, Su YW, Xu X, Ye NH, Cao YY, Lin S, Liu TY, Li HX, Wang GQ** (2016)  
923 SWATH-MS Quantitative Analysis of Proteins in the Rice Inferior and Superior Spikelets  
924 during Grain Filling. *Front Plant Sci* **7**: 1926
- 925 **Zhu FY, Chen MX, Ye NH, Shi L, Ma KL, Yang JF, Cao YY, Zhang Y, Yoshida T, Fernie AR**  
926 (2017) Proteogenomic analysis reveals alternative splicing and translation as part of the  
927 abscisic acid response in Arabidopsis seedlings. *Plant J* **91**: 518-533.
- 928 **Zhu FY, Li L, Lam PY, Chen MX, Chye ML, Lo C** (2013) Sorghum extracellular leucine-rich repeat  
929 protein SbLRR2 mediates lead tolerance in transgenic Arabidopsis. *Plant Cell Physiol* **54**:  
930 1549-1559

931

932

### 933 **Figure Legends**

934 **Figure 1 Identification and comparison between the datasets of differentially**  
935 **expressed genes (DEG) and differentially expressed alternative splicing (DAS)**  
936 **events during rice hypoxic germination.** (A) Statistics of the identified alternative  
937 splicing (AS) events and types. ALE, alternative last exon; AFE, alternative first exon;  
938 SKIP, exon skipping; IR, intron retention; AE5', alternative donor; AE3', alternative  
939 acceptor. (B) The Venn diagram represents unique and shared genes between DEG  
940 and DAS datasets. (C) Gene ontology enrichment analysis between DEG and DAS  
941 datasets. (D) RT-PCR validation of the DAS events in mRNA surveillance pathway.  
942 Air: air control; Hyp: Hypoxia; ND: not detected. Gene models of each isoform are  
943 indicated (blue: coding region; white: non-coding UTRs; not to scale).

944

945 **Figure 2 qRT-PCR validations of DAS events.** Validation of DAS events detected in  
946 KEGG enrichment analysis. DAS events involved in categories of (A) mRNA  
947 surveillance pathway and lysosome, (B) lysosome, (C) protein export, (D) proteasome  
948 was verified by qRT-PCR analysis from three biological replicates. *OsACTIN1* was  
949 used as an internal reference gene. Mean values  $\pm$ SD are presented (n=3). ‘\*\*\*’ and ‘\*\*’  
950 represent mean values of hypoxia-treated (Hyp) group is significantly higher or lower  
951 than that in air control (Air),  $P < 0.01$  and  $P < 0.05$ , respectively. Gene models of each

952 isoform are indicated (blue: coding region; white: non-coding UTRs; not to scale).

953

954 **Figure 3 Qualitative proteomic identification of AS peptides.** (A) Venn diagram  
955 representation of qualitative proteomic identification using UniProt, AS and DAS  
956 databases. (B) AS peptides identification and classification (upper panel). ALE,  
957 alternative last exon; AFE, alternative first exon; SKIP, exon skipping; IR, intron  
958 retention; AE5', alternative donor; AE3', alternative acceptor. Summary of identified  
959 AS/DAS events and peptides (lower panel). (C) KEGG pathway enrichment analysis  
960 of DAS peptides in qualitative proteomics. '\*' marked pathway is repeatedly found in  
961 both transcriptome and qualitative proteomic datasets.

962

963 **Figure 4 Comparison between proteomic and transcriptomic datasets.** Venn  
964 diagram representation of (A) differentially expressed genes (DEG) vs. differentially  
965 expressed proteins (DEP), (B) differentially expressed AS events (DAS) vs.  
966 differentially expressed AS peptides (DASDP), (C) DEP vs. DASDP. Heatmap  
967 representation (D) and correlation analysis (E) of overlapping genes between DEG  
968 and DEP. (F) Heatmap representation of overlapping genes between DAS and DASDP.  
969 ALE, alternative last exon; '\*' represents the regulation of transcripts and proteins at  
970 the same trend in corresponding datasets; H: L, hypoxia vs. air control.

971

972 **Figure 5 Novel protein/peptide identification.** (A) Summary of the spectrum usage  
973 of the data from qualitative proteomics using UniProt, AS and DAS databases. (B)  
974 Spectrum usage of the data from qualitative proteomic using the 6-frame translated  
975 protein database. (C) Pie diagram represents percentage distribution of identified  
976 novel proteins/peptides. (D) Venn diagram representation of identified novel  
977 proteins/peptides in control and hypoxia-treated samples. (E) Venn diagram represents  
978 the shared and unique genes among differentially expressed genes (DEG),  
979 differentially expressed proteins (DEP) and differentially expressed frame proteins  
980 (DE FP).

981

982 **Figure 6 Splicing sites recognition under hypoxia stress.** (A) Statistical analysis of  
983 the splicing sites (ss) between the total AS events and the hypoxia-affected DAS  
984 events. (B) Conservation analysis using sequence located at exon-intron junctions.

985

986 **Figure 7 Splicing factors involved in hypoxia responses during rice germination.**  
987 (A) The Venn diagram represents identified splicing factors between DEG and DAS

988 datasets. (B) Statistics of hypoxia-affected DAS genes and events of splicing factors.

989 (C) Pie chart distribution of the DAS events belonging to splicing factors. (D)

990 Subgroup classification of splicing factors identified in DAS events. (E) qRT-PCR

991 validation of DAS events detected in spliceosome. DAS events in the category of

992 spliceosome were verified by qRT-PCR analysis from three biological replicates.

993 *OsACTINI* was used as an internal reference gene. Mean values $\pm$ SD are presented

994 (n=3). ‘\*\*\*’ and ‘\*’ represent the mean values of hypoxia-treated (Hyp) group is

995 significantly higher or lower than that in air control (Air),  $P<0.01$  and  $P<0.05$ ,

996 respectively. Gene models of each isoform are indicated (blue: coding region; white:

997 non-coding UTRs; not to scale).

998

999 **Figure 8 Model of alternative splicing and alternative translation initiation**  
1000 **involved in the hypoxic germination pathway.**

1001 Summary model of the rice genome using its coding ability to produce diverse  
1002 functional proteins during hypoxic germination. The traditional transcriptional  
1003 pathway (blue) has been well studied. The parallel pathway of alternative splicing (AS,  
1004 orange) is able to generate AS isoforms, which in turn can be translated into protein  
1005 isoforms in response to hypoxia treatment. In the third pathway of alternative  
1006 translation initiation (ATI, violet), upstream open reading frames (uORFs) and small  
1007 ORFs (sORFs) can further expand the protein diversity under hypoxia treatment.

1008

1009 **Figure S1 Analytical pipeline of AS identification, quantification and validation**  
1010 **in this study.**

1011

1012 **Figure S2 Comparison of previous published datasets and qRT PCR validation.**

1013 (A) Heatmap comparison of previous published microarray datasets (Pub) to our RNA  
1014 seq analysis (Our). (B) qRT-PCR validations of the selected and marker genes during  
1015 hypoxic germination from three biological replicates. *OsACTINI* was used as an  
1016 internal reference gene. ‘\*’ and ‘\*\*\*’ denote that the relative mRNA level is  
1017 significantly higher in hypoxia-treated samples (grey bars) in comparison to air  
1018 control (black bars) in complete darkness,  $P<0.05$  and  $P<0.01$ , respectively. **Locus**  
1019 **IDs (Bolded)** represent genes have similar expression pattern in qRT-PCR analysis in  
1020 comparison to previous transcriptome or microarray analysis.

1021

1022 **Figure S3 GO enrichment analysis between DAS and DEG datasets from RNA**

1023 **sequencing.**

1024

1025 **Figure S4 qRT-PCR validation of selected genes from DAS events.** Primers used in  
1026 the experiment are listed in Supplemental Table 5. *OsACTIN1* was used as an internal  
1027 reference gene. ‘\*’ and ‘\*\*’ denote that the relative mRNA level is significantly higher  
1028 or lower in hypoxia-treated samples in comparison to air control,  $P < 0.05$  and  $P < 0.01$ ,  
1029 respectively. AS events in bold form represent the consistency between RNA seq and  
1030 qRT-PCR data.

1031

1032 **Figure S5 Comparison of splicing sites (ss) recognition between AS and DAS**  
1033 **events.** ALE, alternative last exon; AFE, alternative first exon; SKIP, exon skipping;  
1034 IR, intron retention; AE5’, alternative donor; AE3’, alternative acceptor.

1035

1036

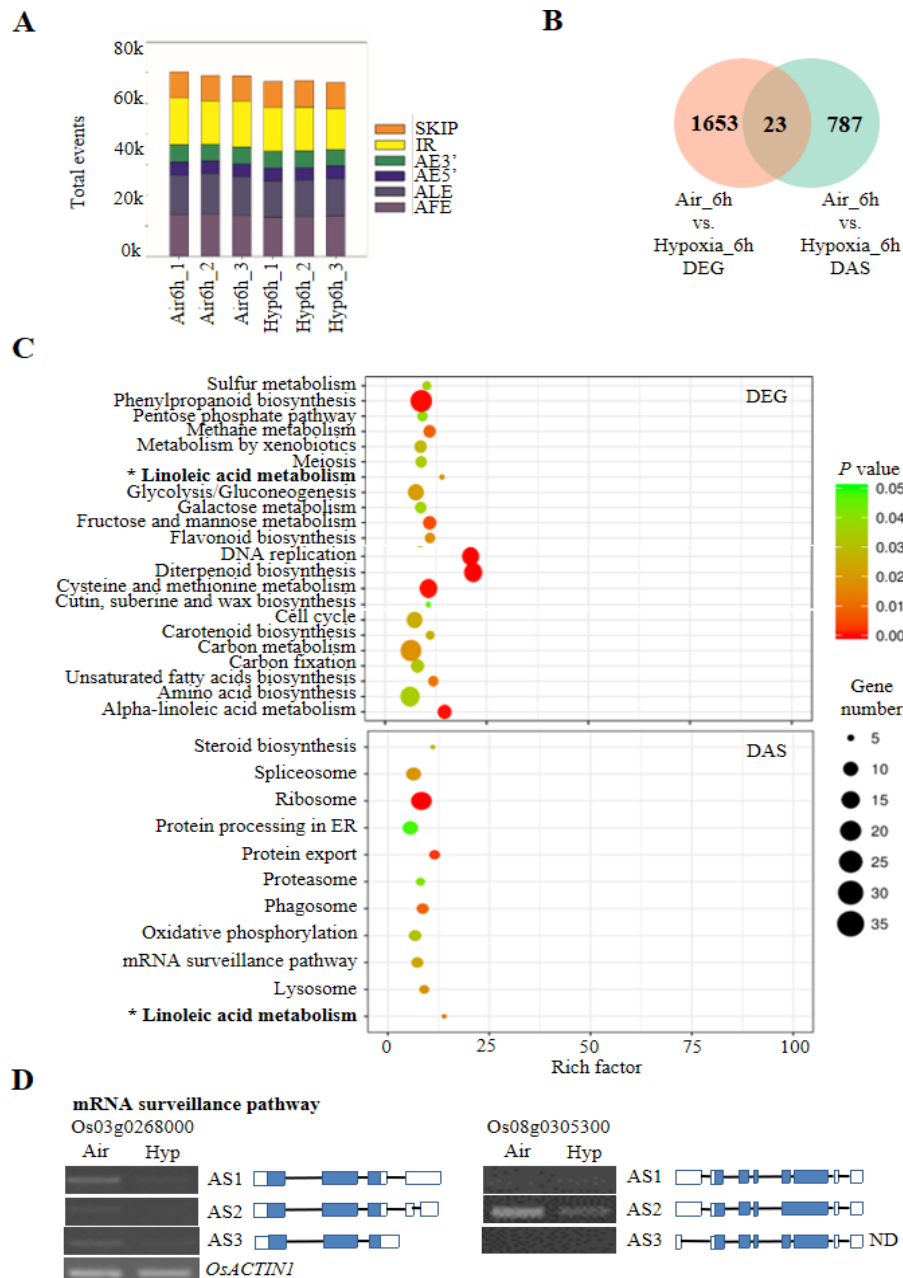

**Figure 1 Identification and comparison between the datasets of differentially expressed genes (DEG) and differentially expressed alternative splicing (DAS) events during rice hypoxic germination.** (A) Statistics of the identified alternative splicing (AS) events and types. ALE, alternative last exon; AFE, alternative first exon; SKIP, exon skipping; IR, intron retention; AE5', alternative donor; AE3', alternative acceptor. (B) The Venn diagram represents unique and shared genes between DEG and DAS datasets. (C) Gene ontology enrichment analysis between DEG and DAS datasets. (D) RT-PCR validation of the DAS events in mRNA surveillance pathway. Air: air control; Hyp: Hypoxia; ND: not detected. Gene models of each isoform are indicated (blue: coding region; white: non-coding UTRs; not to scale).

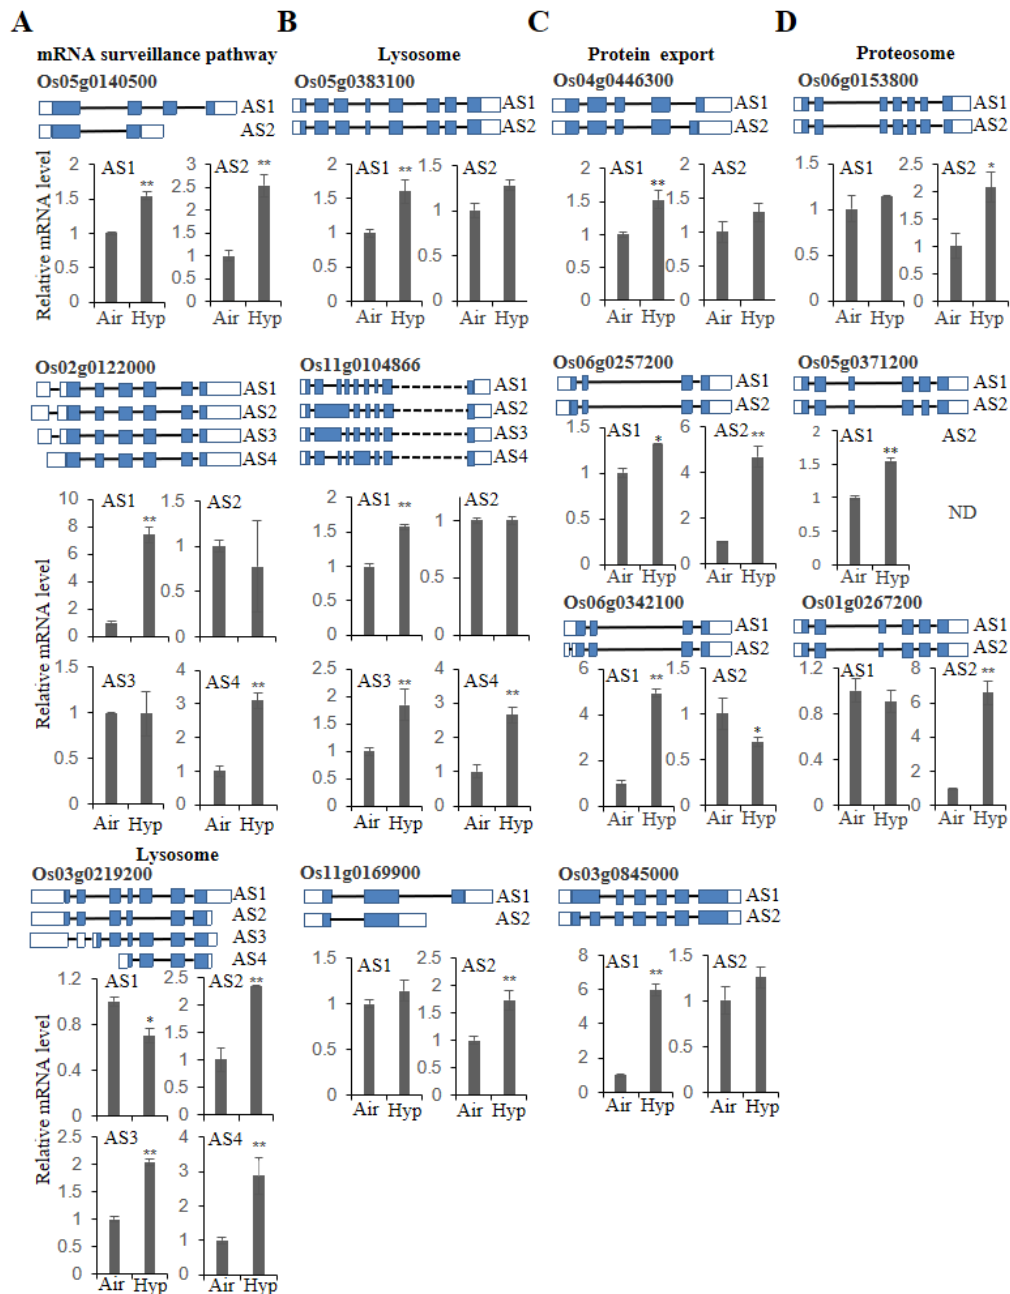

**Figure 2 qRT-PCR validations of DAS events.** Validation of DAS events detected in KEGG enrichment analysis. DAS events involved in categories of (A) mRNA surveillance pathway and lysosome, (B) lysosome, (C) protein export, (D) proteasome was verified by qRT-PCR analysis from three biological replicates. *OsACTIN1* was used as an internal reference gene. Mean values±SD are presented (n=3). ‘\*\*\*’ and ‘\*’ represent mean values of hypoxia-treated (Hyp) group is significantly higher or lower than that in air control (Air),  $P < 0.01$  and  $P < 0.05$ , respectively. Gene models of each isoform are indicated (blue: coding region; white: non-coding UTRs; not to scale).

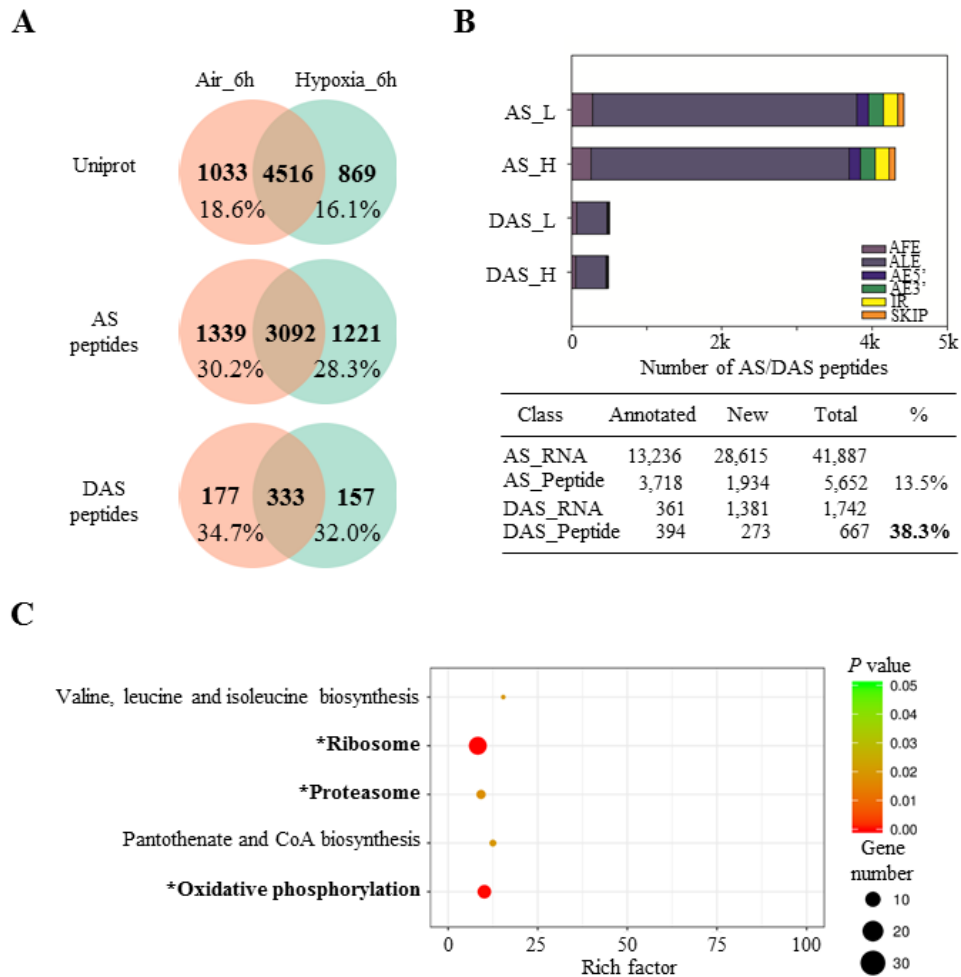

**Figure 3 Qualitative proteomic identification of AS peptides.** (A) Venn diagram representation of qualitative proteomic identification using UniProt, AS and DAS databases. (B) AS peptides identification and classification (upper panel). ALE, alternative last exon; AFE, alternative first exon; SKIP, exon skipping; IR, intron retention; AE5', alternative donor; AE3', alternative acceptor. Summary of identified AS/DAS events and peptides (lower panel). (C) KEGG pathway enrichment analysis of DAS peptides in qualitative proteomics. ‘\*’ marked pathway is repeatedly found in both transcriptome and qualitative proteomic datasets.

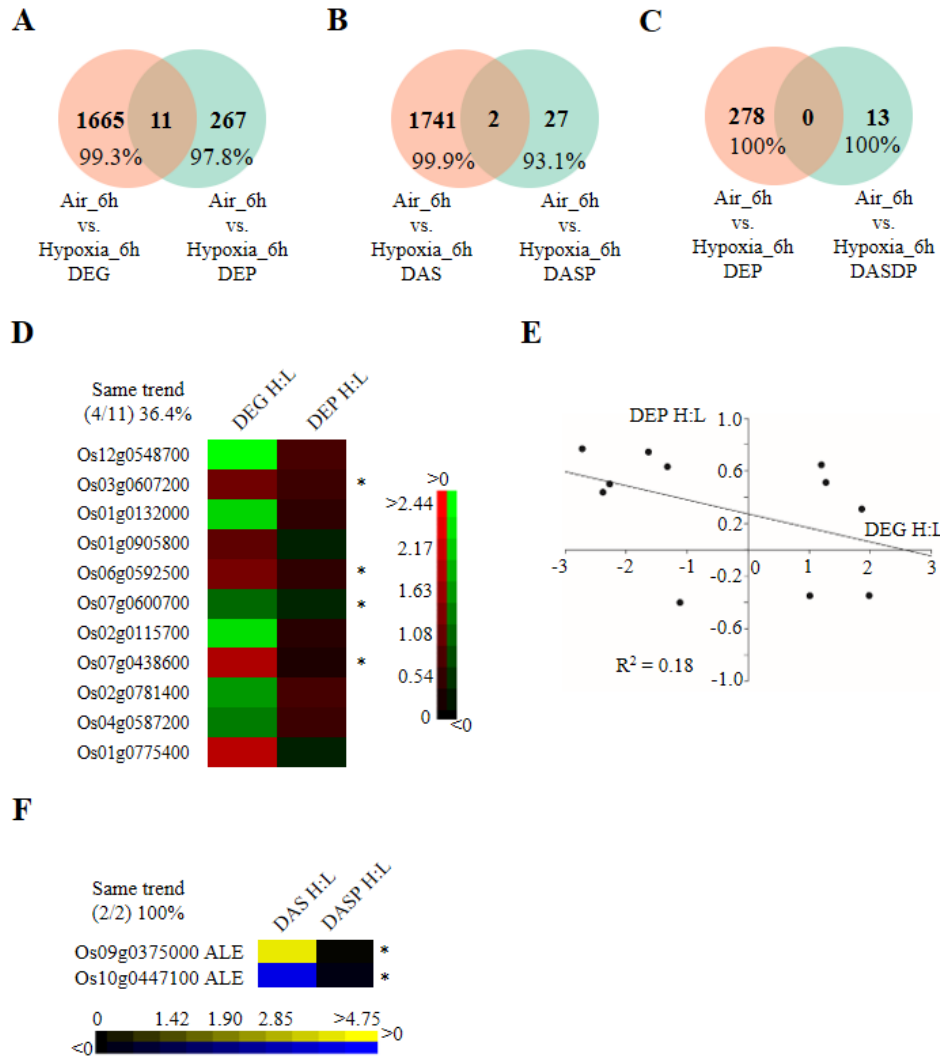

**Figure 4 Comparison between proteomic and transcriptomic datasets.** Venn diagram representation of (A) differentially expressed genes (DEG) vs. differentially expressed proteins (DEP), (B) differentially expressed AS events (DAS) vs. differentially expressed AS peptides (DASDP), (C) DEP vs. DASDP. Heatmap representation (D) and correlation analysis (E) of overlapping genes between DEG and DEP. (F) Heatmap representation of overlapping genes between DAS and DASDP. ALE, alternative last exon; '\*' represents the regulation of transcripts and proteins at the same trend in corresponding datasets; H: L, hypoxia vs. air control.



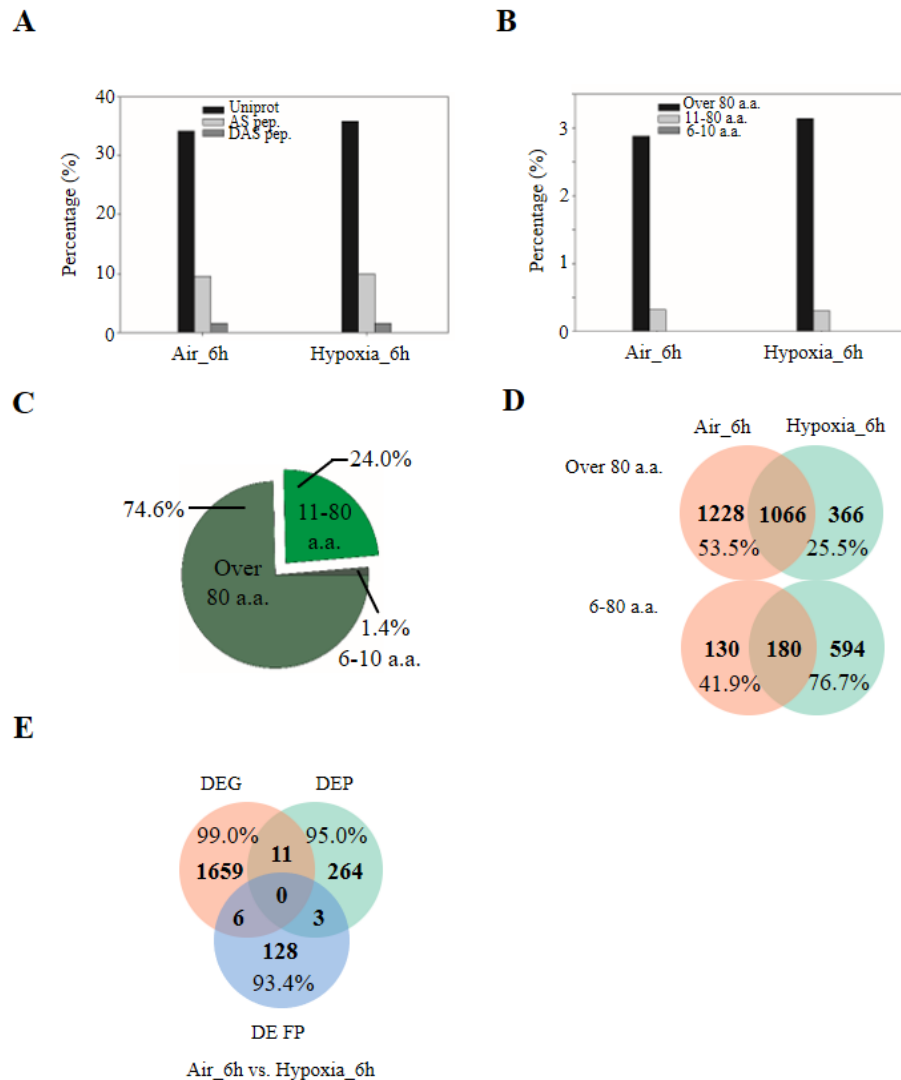

**Figure 5 Novel protein/peptide identification.** (A) Summary of the spectrum usage of the data from qualitative proteomics using UniProt, AS and DAS databases. (B) Spectrum usage of the data from qualitative proteomic using the 6-frame translated protein database. (C) Pie diagram represents percentage distribution of identified novel proteins/peptides. (D) Venn diagram representation of identified novel proteins/peptides in control and hypoxia-treated samples. (E) Venn diagram represents the shared and unique genes among differentially expressed genes (DEG), differentially expressed proteins (DEP) and differentially expressed frame proteins (DE FP).

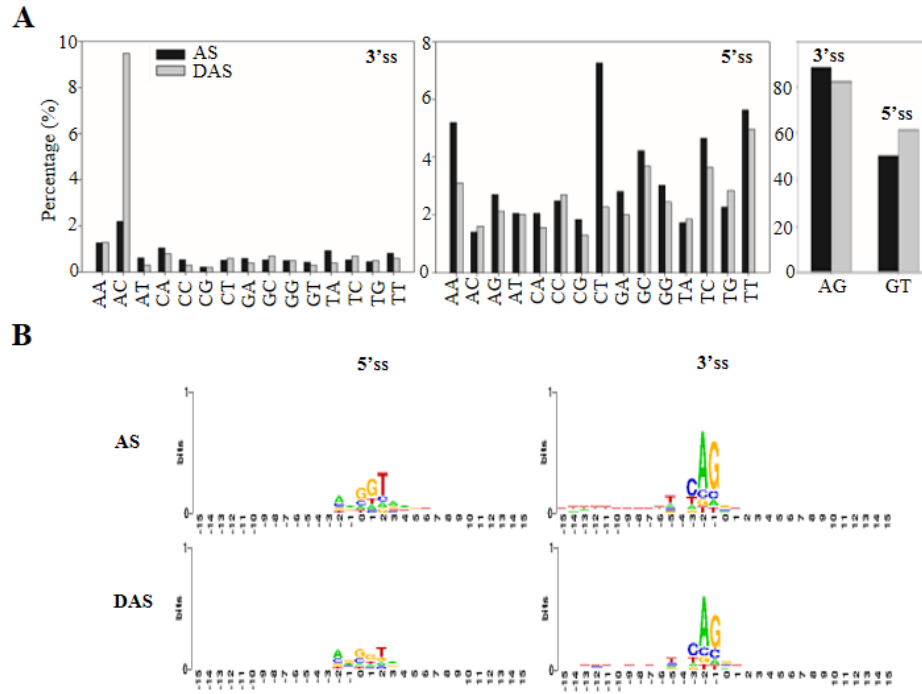

**Figure 6 Splicing sites recognition under hypoxia stress.** (A) Statistical analysis of the splicing sites (ss) between the total AS events and the hypoxia-affected DAS events. (B) Conservation analysis using sequence located at exon-intron junctions.

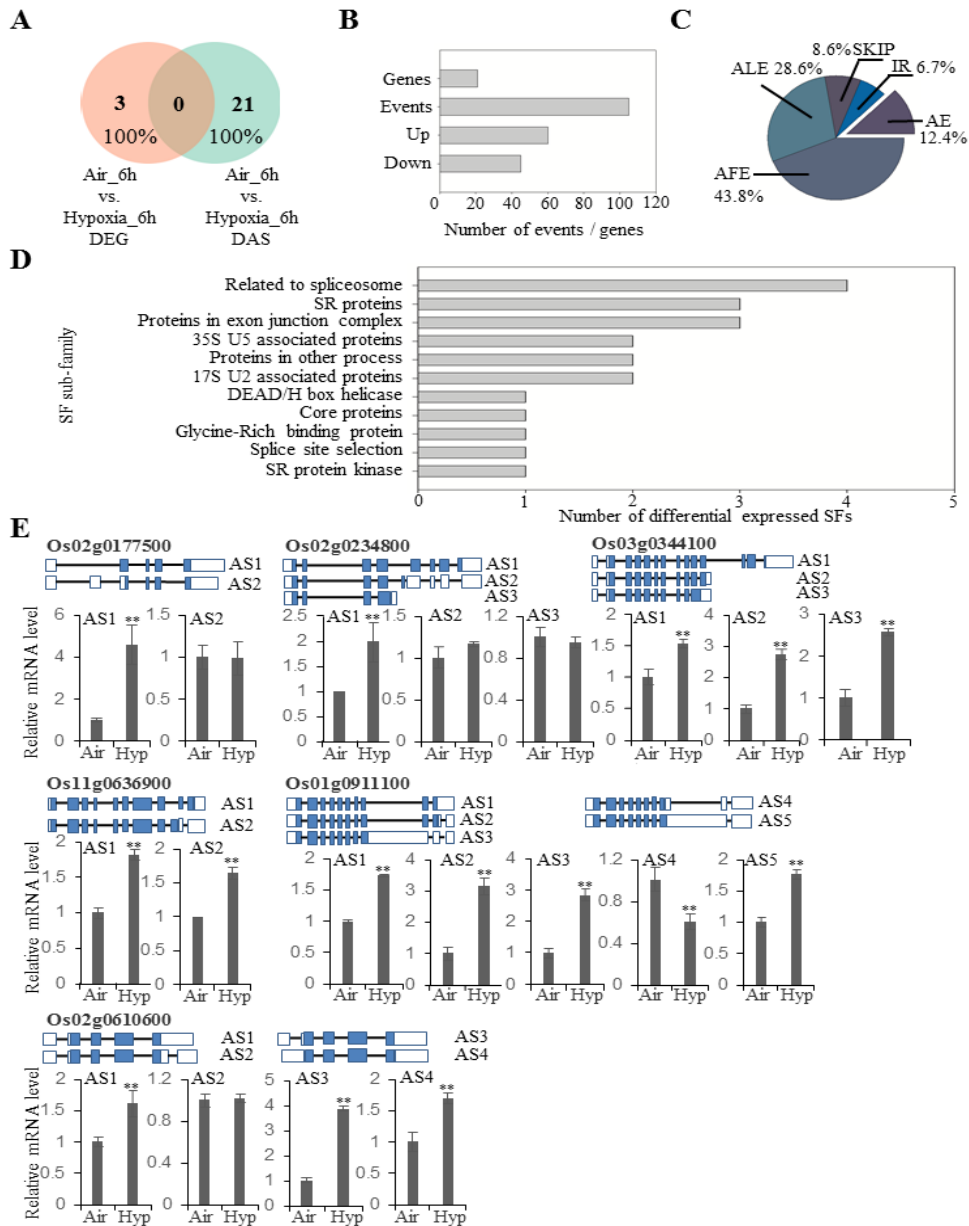

**Figure 7 Splicing factors involved in hypoxia responses during rice germination.**

(A) The Venn diagram represents identified splicing factors between DEG and DAS datasets. (B) Statistics of hypoxia-affected DAS genes and events of splicing factors. (C) Pie chart distribution of the DAS events belonging to splicing factors. (D) Subgroup classification of splicing factors identified in DAS events. (E) qRT-PCR validation of DAS events detected in spliceosome. DAS events in the category of spliceosome were verified by qRT-PCR analysis from three biological replicates.

*OsACTINI* was used as an internal reference gene. Mean values  $\pm$ SD are presented (n=3). ‘\*\*\*’ and ‘\*’ represent the mean values of hypoxia-treated (Hyp) group is significantly higher or lower than that in air control (Air),  $P < 0.01$  and  $P < 0.05$ , respectively. Gene models of each isoform are indicated (blue: coding region; white:

non-coding UTRs; not to scale).

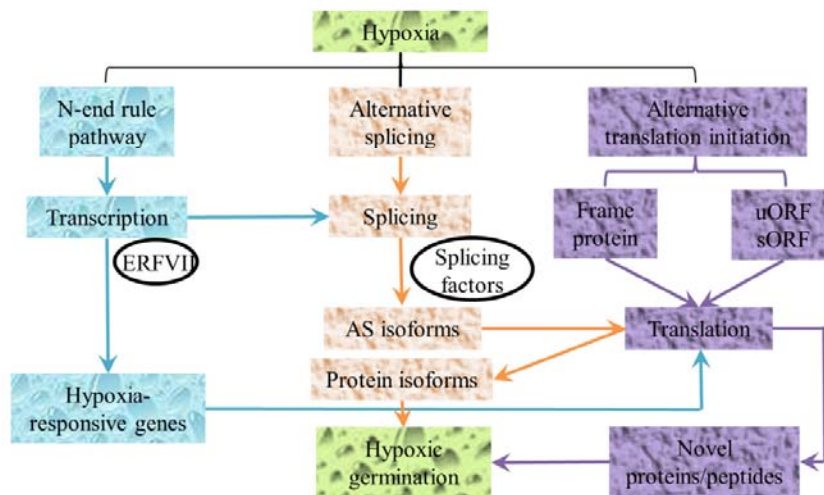

**Figure 8 Model of alternative splicing and alternative translation initiation involved in the hypoxic germination pathway.**

Summary model of the rice genome using its coding ability to produce diverse functional proteins during hypoxic germination. The traditional transcriptional pathway (blue) has been well studied. The parallel pathway of alternative splicing (AS, orange) is able to generate AS isoforms, which in turn can be translated into protein isoforms in response to hypoxia treatment. In the third pathway of alternative translation initiation (ATI, violet), upstream open reading frames (uORFs) and small ORFs (sORFs) can further expand the protein diversity under hypoxia treatment.
